# Supplementary material for: Polo-like kinase acts as a molecular timer that safeguards the asymmetric fate of spindle microtubule-organizing centers
Source: eLife. 2020 Nov 2;9:e61488. doi: 10.7554/eLife.61488 (PMC7669271; doi:10.7554/eLife.61488)
Supplement: Supplementary file 3. [file elife-61488-supp3.xlsx]

## Sheet: Fig. 1
FIGURE 1B:
	Spc42-RFP distribution:
	#1		#2		#3		Average		Std. Dev.
Strain	WT	Reversed	WT	Reversed	WT	Reversed	WT	Reversed	WT	Reversed
F2071	84	16	89	11	88	12	87	13	2.64575	2.64575
F2071 + CMK-C1	84	16	88	12	91	9	87.6667	12.3333	3.51188	3.51188
F2741	83	17	87	13	89	11	86.3333	13.6667	3.05505	3.05505
F2741 + CMK-C1	45	55	38	62	52	48	45	55	7	7
FIGURE 1D:
	Spc72-GFP localization:
	#1		#2		#3		Average		Std. Dev.
Strain	WT	Reversed	WT	Reversed	WT	Reversed	WT	Reversed	WT	Reversed
F3712	87	13	92	8	91	9	90	10	2.64575	2.64575
F3712 + CMK-C1	89	11	92	8	92	8	91	9	1.73205	1.73205
F3707	92	8	92	8	96	4	93.3333	6.66667	2.3094	2.3094
F3707 + CMK-C1	43	57	56	44	63	37	54	46	10.1489	10.1489
FIGURE 1E:
	Spc42-RFP distribution:
	#1		#2		#3		Average		Std. Dev.
Strain	WT	Reversed	WT	Reversed	WT	Reversed	WT	Reversed	WT	Reversed
F3712	85	15	90	10	92	8	89	11	3.60555	3.60555
F3712 + CMK-C1	89	11	94	6	92	8	91.6667	8.33333	2.51661	2.51661
F3707	88	12	88	12	96	4	90.6667	9.33333	4.6188	4.6188
F3707 + CMK-C1	48	52	56	44	61	39	55	45	6.55744	6.55744
FIGURE 1F:
	Spc42-RFP and Spc72-GFP distribution:
	#1		#2		#3		Average		Std. Dev.
Strain	Coincidental	Opposed	Coincidental	Opposed	Coincidental	Opposed	Coincidental	Opposed	Coincidental	Opposed
F3712	98	2	98	2	97	3	97.6667	2.33333	0.57735	0.57735
F3712 + CMK-C1	100	0	98	2	96	4	98	2	2	2
F3707	96	4	96	4	98	2	96.6667	3.33333	1.1547	1.1547
F3707 + CMK-C1	91	9	89	11	90	10	90	10	1	1
FIGURE 1G:
		Spc72-GFP localization:
		#1		#2		#3		Average		Std. Dev.		SEM
Strain	Temp. (ºC)	WT	Reversed	WT	Reversed	WT	Reversed	WT	Reversed	WT	Reversed	WT	Reversed
F3696	23	83	17	73	27	76	24	77.3333	22.6667	5.1316	5.1316	2.96273	2.96273
F3696 + CMK-C1	23	78	22	71	29	75	25	74.6667	25.3333	3.51188	3.51188	2.02759	2.02759
F3699	23	77	23	68	32	80	20	75	25	6.245	6.245	3.60555	3.60555
F3699 + CMK-C1	23	55	45	47	53	58	42	53.3333	46.6667	5.68624	5.68624	3.28295	3.28295
F4606	23	61	39	50	50	62	38	57.6667	42.3333	6.65833	6.65833	3.84419	3.84419
F4439	23	73	27	68	32	73	27	71.3333	28.6667	2.88675	2.88675	1.66667	1.66667
F4699	23	64	36	65	35	62	38	63.6667	36.3333	1.52753	1.52753	0.881917	0.881917
F4705	23	84	16	70	30	79	21	77.6667	22.3333	7.0946	7.0946	4.09607	4.09607
F3696	37	77	23	70	30	78	22	75	25	4.3589	4.3589	2.51661	2.51661
F4439	37	55	45	49	51	58	42	54	46	4.58258	4.58258	2.64575	2.64575
F4699	37	61	39	61	39	65	35	62.3333	37.6667	2.3094	2.3094	1.33333	1.33333
F4705	37	60	40	46	54	62	38	56	44	8.7178	8.7178	5.03322	5.03322
FIGURE 1J:
	Spc110-dsRed distribution:
	#1		#2		#3		Average		Std. Dev.		SEM
Strain	WT	Reversed	WT	Reversed	WT	Reversed	WT	Reversed	WT	Reversed	WT	Reversed
F3702	89	11	94	6	91	9	91.3333	8.66667	2.51661	2.51661	1.45297	1.45297
F3702 + CMK-C1	89	11	94	6	92	8	91.6667	8.33333	2.51661	2.51661	1.45297	1.45297
F3705	92	8	90	10	92	8	91.3333	8.66667	1.1547	1.1547	0.666667	0.666667
F3705 + CMK-C1	59	41	46	54	62	38	55.6667	44.3333	8.5049	8.5049	4.91031	4.91031
F4608	88	12	93	7	80	20	87	13	6.55744	6.55744	3.78594	3.78594

## Sheet: Fig. 2
FIGURE 2B:
	Kar9-sfGFP localization:
	#1		#2		#3		Average		Std. Dev.
Strain	WT	Reversed	WT	Reversed	WT	Reversed	WT	Reversed	WT	Reversed
F3754 + DMSO	93	7	96	4	96	4	95	5	1.73205	1.73205
F3754 + CMK-C1	94	6	97	3	96	4	95.6667	4.33333	1.52753	1.52753
F3755 + DMSO	96	4	98	2	97	3	97	3	1	1
F3755 + CMK-C1	52	48	36	64	51	49	46.3333	53.6667	8.96289	8.96289
FIGURE 2C:
	Spc110-dsRed distribution:
	#1		#2		#3		Average		Std. Dev.
Strain	WT	Reversed	WT	Reversed	WT	Reversed	WT	Reversed	WT	Reversed
F3754 + DMSO	95	5	92	8	86	14	91	9	4.58258	4.58258
F3754 + CMK-C1	90	10	90	10	90	10	90	10	0	0
F3755 + DMSO	94	6	90	10	96	4	93.3333	6.66667	3.05505	3.05505
F3755 + CMK-C1	67	33	58	42	65	35	63.3333	36.6667	4.72582	4.72582
FIGURE 2D:
	Spc110-dsRed and Kar9-sfGFP distribution:
	#1		#2		#3		Average		Std. Dev.
Strain	Coincidental	Opposed	Coincidental	Opposed	Coincidental	Opposed	Coincidental	Opposed	Coincidental	Opposed
F3754 + DMSO	90	10	90	10	82	18	87.3333	12.6667	4.6188	4.6188
F3754 + CMK-C1	86	14	91	9	88	12	88.3333	11.6667	2.51661	2.51661
F3755 + DMSO	94	6	88	12	93	7	91.6667	8.33333	3.21455	3.21455
F3755 + CMK-C1	69	31	68	32	56	44	64.3333	35.6667	7.23418	7.23418
FIGURE 2E:
	Kar9-sfGFP localization
Strain	Localization	#1	#2	#3	Average	Std. Dev.	SEM
F4820 + DMSO	Interpolar	2	2	8	4	3.4641	2
	mSPB	18	10	10	12.6667	4.6188	2.66667
	mMT(+)-end	2	14	8	8	6	3.4641
	dSPB	62	64	46	57.3333	9.86577	5.696
	dMT(+)-end	88	82	94	88	6	3.4641
F4820 + CMK-C1	Interpolar	48	68	62	59.3333	10.2632	5.92546
	mSPB	34	28	30	30.6667	3.05505	1.76383
	mMT(+)-end	34	56	30	40	14	8.0829
	dSPB	36	30	32	32.6667	3.05505	1.76383
	dMT(+)-end	40	48	42	43.3333	4.16333	2.4037

## Sheet: Fig. 3
FIGURE 3A:															FIGURE 3D:													FIGURE 3E:											FIGURE 3F:
Strain	Replica	Cell cycle stage	Time (min)												60 min	Spc72-mCherry fluorescence intensity					75 min	Spc72-mCherry fluorescence intensity						+DMSO	Time (min)											Fluorescence intensity
			0	30	45	60	75	90	105	120	135	150				+DMSO		+CMK-C1				+DMSO		+CMK-C1					45 (*)	60	75	90	105	120 (*)	135 (*)	150 (*)				F3696		F4606		F4699
F3053 + DMSO	#1	Others	99	98	41	4	0	1	37	85	98	88			Cell	dSPB	mSPB	dSPB	mSPB		Cell	dSPB	mSPB	dSPB	mSPB			Cell	Spc72-mCherry fluorescence intensity ratio											Spc72-GFP		Spc72-AA-GFP		Spc72-GFP cdc5-16
		Metaphase	0	2	59	95	92	19	3	4	0	12			1	4434	3337	3148	1916.33		1	9464.67	5228.67	1561	771			1		1.32874	1.81015	1.40732	0.856362		0.515903				Cell	dSPB	mSPB	dSPB	mSPB	dSPB	mSPB
		Anaphase	1	0	0	1	8	80	60	11	2	0			2	1622	3619.33	3404.33	2244.33		2	7085	3945.33	2612.67	1307			2	1.61866	0.448149	1.79579	0.902951	1.07949		2.39705				1	201838	69101	63025	135188	94150	59737
	#2	Others	99	95	30	6	0	3	31	86	95	79			3	657	2737.67	2701.67	1276.33		3	5789	4513	1212.33	1040			3	1.07933	0.239985	1.28274	1.38773	0.856274						2	87412	37337	142938	49988	195750	133062
		Metaphase	1	5	69	92	89	24	6	0	2	18			4	1725.67	48.67	1397.67	1090.33		4	9614.67	2046.33	3803.67	1028.33			4		35.4589	4.69848	1.01589	2.03222			2.47083			3	150512	43287	136438	98575	75237	132649
		Anaphase	0	0	1	2	11	73	63	14	3	3			5	3664	1657.67	652.67	1599.67		5	9966	3992.67	2955	716.33			5	1.69751	2.21034	2.49608	1.60397	0.730789		0.744652				4	94713	78538	97200	109863	100937	75512
	#3	Others	100	96	30	6	0	0	34	82	94	82			6	3890.67	918	1430.67	2189.33		6	4943.33	7940	1819.33	461			6		4.2382	0.622586	1.073	0.736009		0.593828				5	191101	120450	176887	238800	96850	137413
		Metaphase	0	4	70	93	93	20	5	1	2	18			7	1790.67	4882	4943	3139.33		7	12113	11207.3	1338.33	427.67			7	2.15136	0.36679	1.08081	1.05107	1.24574		1.78498				6	67750	27562	147225	169925	37275	68425
		Anaphase	0	0	0	1	7	80	61	17	4	0			8	1436.33	677	6013.67	3441		8	9108.67	10387.3	759.67	189.33			8	0.937396	2.12161	0.876901	2.82863	0.793599		1.80891				7	197162	91888	136375	56825	135426	22338
	Statistics	Cell cycle stage	Time (min)												9	7477.33	1224.67	3468	1404.67		9	6563.33	4371	1979	897.67			9	1.57458	6.10561	1.50156	1.36886	1.10492	3.80449	2.02541				8	75900	64187	150662	79037	107275	66887
			0	30	45	60	75	90	105	120	135	150			10	2587	1062.33	2523.33	1980.67		10	7314	6247	1913.67	2934.33			10	4.89008	2.4352	1.1708	1.30595	0.987348	2.11406		6.03636			9	175900	40525	132287	121850	88974	12099
	Average	Others	99.3333	96.3333	33.6667	5.33333	0	1.33333	34	84.3333	95.6667	83			11	3994	2640.33	2843.67	2447		11	7782	12716.3	857.33	2637.67			11		1.51269	0.611969	1.45563	1.15565	6.64181					10	78625	90700	168713	186662	107774	168362
		Metaphase	0.333333	3.66667	66	93.3333	91.3333	21	4.66667	1.66667	1.33333	16			12	1351	5422.33	2304	1492		12	8189.33	4653.67	1056.33	1342			12		0.249155	1.75976	1.4296	2.34742	4.50866					11	292525	247413	7738	33125	117537	20125
		Anaphase	0.333333	0	0.333333	1.33333	8.66667	77.6667	61.3333	14	3	1			13	2396.67	471.67	67	577.33		13	12240.7	6563.33	353.67	364			13	2.68702	5.08127	1.86501	2.35493	0.958332						12	290787	302062	98525	78250	199225	75512
	Std. Dev.	Others	0.57735	1.52753	6.35085	1.1547	0	1.52753	3	2.08167	2.08167	4.58258			14	8231.67	3585.33	1752.33	510		14	9341.33	2959.33	1262.67	604.33			14	4.55514	2.29593	3.15657	0.960681	1.51388			3.5594			13	273387	147450	125863	50076	143762	51087
		Metaphase	0.57735	1.52753	6.08276	1.52753	2.08167	2.64575	1.52753	2.08167	1.1547	3.4641			15	2844.33	2297.67	2035	643.33		15	4409.33	86	1175.33	296.67			15	1.72365	1.23792	51.2713	0.900124	1.24259						14	169862	171400	129412	130125	231975	129863
		Anaphase	0.57735	0	0.57735	0.57735	2.08167	4.04145	1.52753	3	1	1.73205			16	4211	126.33	420	1538		16	13247	6555	840.33	193			16		33.3325	2.0209	0.795166	0.539547						15	117387	145599	160275	97599	291062	199312
F3053 + CMK-C1	Replica	Cell cycle stage	Time (min)												17	2926.67	574	2282	1436		17	3155.33	1022.33	3929.67	1852.33			17		5.09872	3.0864	1.50475	0.935634			2.90698			16	222387	20838	117600	102613	82000	97625
			0	30	45	60	75	90	105	120	135	150			18	8968.67	2968.67	1786.67	401.33		18	7185.67	1383.67	597	469.33			18	1.25111	3.02111	5.19321	0.871384	2.54488	1.7035		3.07481			17	301037	244812	120275	66962	164100	72363
	#1	Others	100	92	41	7	3	0	2	4	12	20			19	6565	2864	2329	92		19	14014.7	4554.33	229.67	112.33			19	1.247	2.29225	3.07722	1.56736	1.49392						18	192875	125812	120700	147325	203025	69487
		Metaphase	0	7	59	93	97	80	12	9	2	0			20	1042.67	3343	1028	1664		20	11566.7	8807.33	1690.67	2242			20	1.48647	0.311895	1.3133	1.89779	1.63992						19	110125	137349	184463	47325	98101	13051
		Anaphase	0	1	0	0	0	20	86	87	86	80			21	7020	976.67	2962.67	1072.67		21	6047.33	2220	1265.33	1103.33			21	1.53673	7.18771	2.72402	2.30664	1.56165						20	137787	186262	83862	272675	53649	168762
	#2	Others	97	94	40	5	3	1	3	3	10	18			22	2103.67	487.33	4573.33	3202.33		22	6495.67	596.33	1610.33	1892.33			22		4.31669	10.8927	1.28424	1.05221						21	178188	163000	258787	186212	127137	190112
		Metaphase	0	5	60	93	96	63	17	14	1	1			23	1532	5098.33	1383	976.67		23	9740.67	8538.67	1629.67	1126			23		0.30049	1.14077	2.01865	1.11653						22	140412	97649	155363	84038	141162	192424
		Anaphase	3	1	0	2	1	36	80	83	89	81			24	2729.33	1474	2586.33	2816.67		24	3902	1098	1218.67	806.67			24	1.98975	1.85165	3.55373	1.16093	0.945609						23	130250	139938	118012	66137	137726	120601
	#3	Others	96	97	31	3	4	0	2	2	8	17			25	6406.67	2947	2724.67	1650.33		25	5234	420.67	3544	1748.33			25	1.14786	2.17396	12.4421	2.55368	4.59006						24	116476	127238	120900	89400	152413	65688
		Metaphase	1	3	69	95	96	80	15	9	3	0			26	4660.67	1117.67	2304	1237.33		26	4917.33	3553.67	2737.67	3374			26	0.215962	4.17	1.38373	0.989541	0.856643	1.08052					25	130787	81875	152576	262813	215450	118625
		Anaphase	3	0	0	2	0	20	83	89	89	83			27	3112	7216	5672	2645		27	2388.67	341.33	2937.67	209.33			27	161.807	0.431264	6.99805	1.15507	1.87869	9.50645					26	217000	58688	81512	45613	162263	76750
	Statistics	Cell cycle stage	Time (min)												28	1998	913.67	2287	1964.67		28	3951	527	122.33	1001			28	5.1421	2.18679	7.49715	2.28994	1.0184	6.83018		0.254856			27	140649	158062	85563	168263	37150	36913
			0	30	45	60	75	90	105	120	135	150			29	6123	1436.67	2020	1351.33		29	7123.33	3787	847.33	23.67			29	3.4157	4.26195	1.881	1.21776	0.746202	3.02393		2.34972			28	161963	146425	52150	23850	188225	52850
	Average	Others	97.6667	94.3333	37.3333	5	3.33333	0.333333	2.33333	3	10	18.3333			30	3579	2395.67	1042	627		30	13331.3	13141.7	2744.67	2984			30		1.49395	1.01443	0.818292	1.37064	1.8958					29	148175	118750	76024	121887	48526	128113
		Metaphase	0.333333	5	62.6667	93.6667	96.3333	74.3333	14.6667	10.6667	2	0.333333			31	4633.67	952	777	486.33		31	9235	3437.67	4301.33	724			31	2.93755	4.8673	2.68642	1.67327	0.854845						30	152688	65463	140512	73550	31700	77163
		Anaphase	2	0.666667	0	1.33333	0.333333	25.3333	83	86.3333	88	81.3333			32	4614	3689	647.67	298.67		32	12289.7	6246.33	1355.33	503.33			32	0.397308	1.25074	1.9675	2.09316	1.04399						31	120325	152037	139138	164550	77650	51462
	Std. Dev.	Others	2.08167	2.51661	5.50757	2	0.57735	0.57735	0.57735	1	2	1.52753			33	10758	7687.67	1529.67	799.33		33	2671	3606	1502	1679			33	0.311972	1.39938	0.74071	2.69163	0.886898						32	233576	122488	111425	133337	113162	60500
		Metaphase	0.57735	2	5.50757	1.1547	0.57735	9.81495	2.51661	2.88675	1	0.57735			34	3986.67	3268.67	3185.33	820.67		34	1277	5008.67	2478.33	378.33			34	1.24863	1.21966	0.254958	1.9801	2.10484						33	145463	80151	74438	36788	150212	40975
		Anaphase	1.73205	0.57735	0	1.1547	0.57735	9.2376	3	3.05505	1.73205	1.52753			35	3623.67	970	2352.33	2014		35	8595.33	6346.67	4097.33	216.33			35		3.73574	1.35431	2.15995	0.847313			1.4839			34	102012	114512	89438	78362	164074	111000
															36	5198	4399	4134.67	1429.67		36	8912.33	5857.67	2618.33	408			36		1.18163	1.52148	1.69834							35	185763	190688	213650	162650	211463	153001
															37	4547	683.33	720.67	1875		37	6829.33	1033.33	1295	820.33			37		6.65415	6.60903	1.38007		1.90834					36	188025	75450	89525	102638	174362	62712
FIGURE 3B:															38	7088	253.33	667	981		38	3181.33	2396	882	1312.67			38		27.979	1.32777	1.22013	1.95534	0.362399					37	137812	134950	125237	95287	134363	78901
															39	1160	9279.67	2076.33	239.67		39	6292.33	4547.33	611	212.67			39	0.988183	0.125004	1.38374	1.03218	0.905419	1.01501					38	209438	198537	97487	114763	79662	82587
Strain	Replica	Cdc5 localization	Time (min)												40	649.33	1311	2419	1226.33		40	6765.67	4354.33	1149.33	1603			40	1.04767	0.495296	1.55378	1.41151		0.947334					39	259387	400937	30613	9187	48237	105149
			0	30	45	60	75	90	105	120	135	150			41	4802.67	561.33	2908.33	1640.67		41	12322	6685.67	219.67	2629.67			41		8.55582	1.84305	1.17667		0.776415					40	151849	141224	53924	148287	21825	62425
F3053 + DMSO	#1	Not localized	100	28	0	0	0	6	64	96	46	10			42	3842	120	1736.67	2103		42	11490.7	4665.67	2300.33	210			42	1.06197	32.0167	2.46281	1.1659		0.827463					41	173375	121250	90400	93275	114674	85799
		1 SPB	0	72	24	0	0	0	0	0	52	58			43	8566.67	85	526.33	1016		43	6239.67	4433	5311.67	848			43	0.943551	1.1799	1.40755	0.786335	1.06259	0.604801					42	204950	160275	49500	56788	75312	140949
		dSPB	0	0	4	8	14	36	14	4	0	4			44	9842.33	2381.33	487.67	1642.33		44	6106.67	7810.67	1266.67	842			44	0.804128	4.13312	0.781837	1.90186	0.942813	0.297928					43	204013	173225	149013	118238	141537	17050
		mSPB	0	0	0	14	6	4	0	0	2	0			45	11799	5805.67	1536.33	2269.67		45	9446.33	2371.33	2171.67	915.33			45	1.45062	2.03233	3.98355	2.76316	0.959852	0.596957					44	215825	175313	288262	168825	115975	91650
		Symmetric	0	0	72	78	80	54	22	0	0	28			46	3805	1736.67	1349	2521		46	9919	12821.7	1690	3652.67			46	2.48254	2.19098	0.773612	1.60206	1.21876	5.29846		2.40166			45	93151	63763	107675	78962	135712	11212
	#2	Not localized	100	14	0	0	2	2	68	94	48	8			47	4351.67	4359	3348.67	3658		47	6844.33	2793	115	2755.67			47	1.61122	0.998318	2.45053	1.87225	0.878809	1.08311					46	236775	216775	201525	45012	34250	104763
		1 SPB	0	86	28	0	0	0	0	0	50	74			48	3419.33	2343	2488.67	2100.67		48	2659.67	3343.67	386.33	858.33			48	1.49045	1.45938	0.795434	0.914347	0.788732			2.5891			47	199625	162513	136351	72213	76787	28800
		dSPB	0	0	4	16	8	46	18	4	0	10			49	2241	1098.67	1776.67	1040.67		49	12731.7	9435.67	616.33	600.67			49	1.9056	2.03974	1.34931	1.38539	1.31885						48	211062	161212	165900	80250	147813	118662
		mSPB	0	0	4	6	2	2	2	0	0	0			50	1921.33	1045	573	213.67		50	7188	2275.33	604.67	299.33			50	1.07268	1.8386	3.1591	0.712635	0.783138						49	178063	196888	41113	122038	92125	100650
		Symmetric	0	0	64	78	88	50	12	2	2	8																											50	137213	127276	172150	163862	71387	82538
	#3	Not localized	98	28	0	0	0	10	74	96	44	16			90 min	Spc72-mCherry fluorescence intensity					105 min	Spc72-mCherry fluorescence intensity						+CMK-C1	Time (min)
		1 SPB	2	72	40	0	0	0	0	0	56	70				+DMSO		+CMK-C1				+DMSO		+CMK-C1					45 (*)	60	75	90	105	120	135	150
		dSPB	0	0	12	6	2	28	20	2	0	4			Cell	dSPB	mSPB	dSPB	mSPB		Cell	dSPB	mSPB	dSPB	mSPB			Cell	Spc72-mCherry fluorescence intensity ratio
		mSPB	0	0	6	8	4	0	0	0	0	0			1	8832.33	6276	2863	480		1	13678.7	15973	4016	1156.33			1	0.706848	1.64272	2.02464	5.96458	3.47305	0.210429	0.749496	1.77548
		Symmetric	0	0	42	86	94	62	6	2	0	10			2	6742.33	7467	1861.67	672.67		2	13961.3	12933.3	7647.33	5257.33			2		1.51686	1.99898	2.76759	1.4546	6.66474	0.720472	1.58436
	Statistics	Cdc5 localization	Time (min)												3	7574.67	5458.33	4557	818.67		3	11023.7	12874	1010.33	4347.33			3	1.59425	2.11674	1.1657	5.56637	0.232403	4.43692	0.417027	1.26555
			0	30	45	60	75	90	105	120	135	150			4	3410.67	3357.33	1112.33	934		4	10616.3	5224	8845.33	1173			4	0.2149	1.28187	3.69887	1.19094	7.54078	14.8801	1.85089	8.80923
	Average	Not localized	99.3333	23.3333	0	0	0.666667	6	68.6667	95.3333	46	11.3333			5	10608.7	6614	7767	4157		5	11184	15304	1335	153.67			5	0.372035	0.408002	4.12517	1.86841	8.68764	11.5273	1.25382	3.08761
		1 SPB	0.666667	76.6667	30.6667	0	0	0	0	0	52.6667	67.3333			6	8878.33	8274.33	1177	145.33		6	9543.33	12966.3	5693.67	1393.33			6	0.816261	0.653471	3.94649	8.09862	4.08636	4.48585	2.44733	1.68696
		dSPB	0	0	6.66667	10	8	36.6667	17.3333	3.33333	0	6			7	10372	9868	1112	6051		7	14697.7	11798.3	7613.33	446.33			7	0.663117	1.57454	3.12938	0.183771	17.0575	1.45521	0.381601	2.42006
		mSPB	0	0	3.33333	9.33333	4	2	0.666667	0	0.666667	0			8	8247.33	2915.67	764.67	236.67		8	13374	16852.3	4272.67	1813			8		1.74765	4.01232	3.23099	2.35668	0.189822	2.67145	3.46036
		Symmetric	0	0	59.3333	80.6667	87.3333	55.3333	13.3333	1.33333	0.666667	15.3333			9	10942.7	7994	3284	760.33		9	9990.33	9041.67	8257.67	1370			9		2.46891	2.2046	4.31916	6.02749	3.69654	1.54225	5.10826
	Std. Dev.	Not localized	1.1547	8.0829	0	0	1.1547	4	5.03322	1.1547	2	4.16333			10	9860.33	7550.33	5008	676.33		10	12954	13120	8257.33	2730			10	1.74136	1.27398	0.652164	7.40463	3.02466	3.85935	2.12607	0.470855
		1 SPB	1.1547	8.0829	8.32666	0	0	0	0	0	3.05505	8.32666			11	11384	7820.67	7806.33	427.33		11	14940.7	12928.3	3467.33	4393.67			11	0.805401	1.1621	0.325035	18.2675	0.789166	3.25228	5.69509	2.64058
		dSPB	0	0	4.6188	5.2915	6	9.0185	3.05505	1.1547	0	3.4641			12	3036	2123.67	1033.67	770		12	12666.7	5396	13254	11640.7			12	63.6167	1.54424	0.787134	1.34242	1.1386	0.897313	2.49315	1.98159
		mSPB	0	0	3.05505	4.16333	2	2	1.1547	0	1.1547	0			13	10613.7	4507	4009.33	374.67		13	9606	10023.7	1874	1316.33			13	1.16686	0.116051	0.971612	10.7011	1.42365	3.1151	0.862804	9.00079
		Symmetric	0	0	15.5349	4.6188	7.02377	6.1101	8.0829	1.1547	1.1547	11.0151			14	11060	11512.7	4891	527.67		14	17631.7	11646.7	974.67	957.33			14	0.854098	3.43595	2.08935	9.26911	1.01811	0.128539	1.45044	3.64523
	SEM	Not localized	0.666667	4.66667	0	0	0.666667	2.3094	2.90593	0.666667	1.1547	2.4037			15	10121	11244	322	2095.67		15	19349.7	15572	11139	14900.3			15	0.517085	3.16321	3.9618	0.15365	0.747567	1.39875	1.77654	0.246548
		1 SPB	0.666667	4.66667	4.8074	0	0	0	0	0	1.76383	4.8074			16	8817.33	11088.7	1053	1553.33		16	2728.67	5057.33	2415	742.33			16	1.10699	0.273082	4.35406	0.677897	3.25326	1.83938	1.71123	0.763947
		dSPB	0	0	2.66667	3.05505	3.4641	5.20683	1.76383	0.666667	0	2			17	13208.7	8778	674.33	3273.33		17	15655.3	16732.3	6359	1515			17		1.58914	2.12147	0.206008	4.19736	0.187173	6.44236	0.471735
		mSPB	0	0	1.76383	2.4037	1.1547	1.1547	0.666667	0	0.666667	0			18	8464.33	9713.67	422.33	568		18	15423.7	6060.67	4468	988.33			18	0.737033	4.45183	1.27202	0.743545	4.52074	3.65285	0.0830035	0.699934
		Symmetric	0	0	8.96908	2.66667	4.05518	3.52767	4.66667	0.666667	0.666667	6.35959			19	6620	4223.67	2185	1153.33		19	13338.7	8928.67	17824	11319.7			19		25.3152	2.04451	1.89451	1.57461	4.41093	0.638877	0.568757
F3053 + CMK-C1	Replica	Cdc5 localization	Time (min)												20	11246.3	5926	1462.67	167.67		20	9740	5939.33	5899.33	2633.33			20	0.826148	0.617788	0.754089	8.72366	2.24025	0.358942	1.60626	4.28555
			0	30	45	60	75	90	105	120	135	150			21	11273.3	4887.33	144	2115.67		21	9043	5790.67	2376.67	3194.33			21		2.76196	1.14683	0.0680637	0.744026	0.10486	1.33422	0.240797
	#1	Not localized	96	18	0	0	0	0	0	0	0	0			22	13307.3	10362	1862.33	1253.33		22	11628.3	11051.3	6622	9753.33			22	1.52983	1.42813	0.850978	1.4859	0.678947	0.996981	0.757966	3.37089
		1 SPB	4	80	36	0	0	0	0	0	0	0			23	12590.3	6237	2021	177		23	12456.3	11156.3	3470.33	2654.33			23		1.41604	1.44731	11.4181	1.30742	0.938862	2.4166	1.31848
		dSPB	0	0	10	2	12	16	10	22	4	26			24	8462	7289	552.33	398.33		24	13763.3	14555	5849.33	242.67			24	1.86049	0.918225	1.51074	1.38661	24.1044	1.71182	0.477026	2.69138
		mSPB	0	0	6	4	14	26	8	2	4	10			25	19711	7718.67	2172	1077		25	15418	3359	5346	2754.33			25	1.29646	1.65098	2.02707	2.01671	1.94094	1.39841	5.8185	0.938277
		Symmetric	0	2	48	94	74	58	82	76	92	64			26	11353.3	11473.3	133.67	2580		26	12072.7	14093	2213.67	106.67			26	0.420935	1.86207	0.811401	0.0518088	20.7531	0.835041	161.871	2.22226
	#2	Not localized	96	8	0	0	0	0	0	0	0	0			27	13619	11790.7	583	273.67		27	2612	1390.33	4442.67	5684			27		2.14442	14.0334	2.13033	0.781609	4.24779	5.4874	0.191835
		1 SPB	4	92	22	0	0	0	0	0	0	0			28	12852.7	5612.67	4691	2394		28	14373.3	14113.7	2026	269.67			28	0.63034	1.16406	0.122211	1.95948	7.51298	0.593661	1.48427	1.61305
		dSPB	0	0	10	10	6	14	12	18	2	22			29	9542.33	7836	3774	390.33		29	10643.3	14263.3	346.33	1433.67			29		1.49482	35.8028	9.66866	0.241572	1.53645	9.03228	0.668188
		mSPB	0	0	4	6	4	14	4	8	4	4			30	6519.33	7967	514.67	1141.33		30	5695	4155	3728.33	162.33			30	0.771452	1.66188	0.919794	0.450935	22.9672	6.4301	0.475046	3.25255
		Symmetric	0	0	64	84	90	72	84	74	94	74			31	8448.33	5049	1986	1497.33		31	6164	7210.67	908	120			31		1.59767	5.94107	1.32636	7.56667	0.676797	84.7412	2.85616
	#3	Not localized	98	10	0	0	0	0	0	0	0	0			32	15293.3	7306.33	3819	529		32	11581	11093	5708.33	4346.33			32		2.16853	2.69272	7.21928	1.31337	1.92728	1.86561	1.71034
		1 SPB	2	90	36	0	0	0	0	0	0	0			33	9895.33	3676.33	2992.33	735.67		33	14109.7	15909	1031	2287.67			33	0.484528	1.91368	0.89458	4.06751	0.450678	10.3154	1.05262	1.85188
		dSPB	0	0	8	8	10	6	8	10	10	4			34	9619.33	4858	3242.67	1885		34	9041	4295.33	12257.7	2138			34	0.936252	3.8814	6.55066	1.72025	5.73324	9.0425	0.233197	2.24864
		mSPB	0	0	4	4	12	10	4	12	4	6			35	13580.3	6287.33	1914.33	512		35	11829.3	13961	2550.33	1941.67			35		1.16799	18.9399	3.73893	1.31348	0.922196	4.06075	0.958961
		Symmetric	0	0	52	88	78	84	88	78	86	90			36	17438	10267.7	7087.33	9508.33		36	9879	9673	5641.67	1036			36	1.76735	2.89205	6.41748	0.745381	5.44562	1.99119	0.286715	2.12676
	Statistics	Cdc5 localization	Time (min)												37	6332.67	4588.67	3825.33	1181.67		37	18914	13336	3157.67	1461			37		0.384356	1.57863	3.23724	2.16131	2.00018	1.20623	0.116604
			0	30	45	60	75	90	105	120	135	150			38	11824.7	9691.33	3822.33	8617.33		38	12074.7	13225.7	2807	954.67			38		0.679918	0.671915	0.443563	2.94029	8.15385	2.55383	3.10866
	Average	Not localized	96.6667	12	0	0	0	0	0	0	0	0			39	14349	13901.7	3910.67	2240.67		39	17439	16181.7	2600	1000			39	2.07733	8.66342	2.87304	1.74531	2.6	2.04853	2.47485	1.06987
		1 SPB	3.33333	87.3333	31.3333	0	0	0	0	0	0	0			40	10512	7447.33	1495	1070.33		40	9203	15326	2450.67	179.67			40		1.97255	0.716989	1.39676	13.6401	0.539346	0.440748	2.90683
		dSPB	0	0	9.33333	6.66667	9.33333	12	10	16.6667	5.33333	17.3333			41	3547.67	3015	841	1047		41	9994.33	17512.3	3165.67	266			41	7.64747	1.77265	0.083534	0.803247	11.901	3.14485	0.746511	1.17928
		mSPB	0	0	4.66667	4.66667	10	16.6667	5.33333	7.33333	4	6.66667			42	7922.67	6795.33	3946.33	2255		42	2949.33	15601	6258.67	6263.33			42		0.825804	10.954	1.75004	0.999255	1.32042	4.72048	1.13813
		Symmetric	0	0.666667	54.6667	88.6667	80.6667	71.3333	84.6667	76	90.6667	76			43	11044.3	14045.3	1173	3685.67		43	12469.3	5407	2855	5214.33			43	0.95806	0.518045	6.26376	0.31826	0.547529	3.81827	0.368569	0.568885
	Std. Dev.	Not localized	1.1547	5.2915	0	0	0	0	0	0	0	0			44	16574.7	8715	1582.33	1281.33		44	15532	19132	1162.67	126.33			44		0.296935	1.50436	1.23491	9.20317	1.45303	3.83711	4.81537
		1 SPB	1.1547	6.4291	8.0829	0	0	0	0	0	0	0			45	15552	5628.33	1234	626.67		45	18678.7	11098	4519	1701.67			45		0.676898	2.37254	1.96915	2.65563	3.85227	1.90902	0.932432
		dSPB	0	0	1.1547	4.16333	3.05505	5.2915	2	6.1101	4.16333	11.7189			46	6883	4296.33	4088.67	1027		46	15390		1831.67	792.67			46		0.535105	0.462676	3.98117	2.31076	4.28082	2.17059	0.354419
		mSPB	0	0	1.1547	1.1547	5.2915	8.32666	2.3094	5.03322	0	3.05505			47	8686	4639.33	2599.67	1195		47	12305		8351.67	1914			47		0.915436	0.0417322	2.17545	4.36346	1.74759	1.53592	1.04
		Symmetric	0	1.1547	8.32666	5.03322	8.32666	13.0128	3.05505	2	4.16333	13.1149			48	7849.67	8585	3551.33	1883		48	7131		671.33	2682.67			48	2.40615	1.1847	0.450097	1.886	0.250248	2.98829	0.878161	4.57341
	SEM	Not localized	0.666667	3.05505	0	0	0	0	0	0	0	0			49	4964.33	3583.33	3740.33	869.33		49	14983		2050.33	735.33			49		2.68175	1.02608	4.30253	2.7883	2.61039	6.68149	7.9897
		1 SPB	0.666667	3.71184	4.66667	0	0	0	0	0	0	0			50	6559.33	9204.33	2165.67	1824.67		50	11792.7		3970.33	1260.33			50		2.6155	2.02005	1.18679	3.15022	3.68465	15.4526	32.7756
		dSPB	0	0	0.666667	2.4037	1.76383	3.05505	1.1547	3.52767	2.4037	6.76593
		mSPB	0	0	0.666667	0.666667	3.05505	4.8074	1.33333	2.90593	0	1.76383																(*) Note that n<50 as a consequence of the reduced population of cells displaying 2 SPBs at the indicated time point.
		Symmetric	0	0.666667	4.8074	2.90593	4.8074	7.51295	1.76383	1.1547	2.4037	7.57188
FIGURE 3C:
Strain	Replica	Spc72 localization	Time (min)
			0	30	45	60	75	90	105	120	135	150
F3053 + DMSO	#1	Not localized	0	0	0	6	0	0	0	0	0	0
		1 SPB	100	100	24	0	0	2	16	78	98	68
		dSPB	0	0	32	66	74	40	16	10	0	22
		mSPB	0	0	4	12	4	4	10	4	0	4
		Symmetric	0	0	40	16	22	54	58	8	2	6
	#2	Not localized	0	0	6	2	0	0	0	0	0	0
		1 SPB	100	100	28	0	0	0	22	90	98	82
		dSPB	0	0	28	62	60	38	20	0	0	18
		mSPB	0	0	4	6	6	0	14	4	0	0
		Symmetric	0	0	34	30	34	62	44	6	2	0
	#3	Not localized	0	0	6	4	0	0	0	0	0	0
		1 SPB	100	100	38	0	0	0	36	90	98	86
		dSPB	0	0	22	60	62	30	14	0	0	12
		mSPB	0	0	4	8	0	8	4	6	2	2
		Symmetric	0	0	30	28	38	62	46	4	0	0
	Statistics	Spc72 localization	Time (min)
			0	30	45	60	75	90	105	120	135	150
	Average	Not localized	0	0	4	4	0	0	0	0	0	0
		1 SPB	100	100	30	0	0	0.666667	24.6667	86	98	78.6667
		dSPB	0	0	27.3333	62.6667	65.3333	36	16.6667	3.33333	0	17.3333
		mSPB	0	0	4	8.66667	3.33333	4	9.33333	4.66667	0.666667	2
		Symmetric	0	0	34.6667	24.6667	31.3333	59.3333	49.3333	6	1.33333	2
	Std. Dev.	Not localized	0	0	3.4641	2	0	0	0	0	0	0
		1 SPB	0	0	7.2111	0	0	1.1547	10.2632	6.9282	0	9.45163
		dSPB	0	0	5.03322	3.05505	7.57188	5.2915	3.05505	5.7735	0	5.03322
		mSPB	0	0	0	3.05505	3.05505	4	5.03322	1.1547	1.1547	2
		Symmetric	0	0	5.03322	7.57188	8.32666	4.6188	7.57188	2	1.1547	3.4641
	SEM	Not localized	0	0	2	1.1547	0	0	0	0	0	0
		1 SPB	0	0	4.16333	0	0	0.666667	5.92546	4	0	5.4569
		dSPB	0	0	2.90593	1.76383	4.37163	3.05505	1.76383	3.33333	0	2.90593
		mSPB	0	0	0	1.76383	1.76383	2.3094	2.90593	0.666667	0.666667	1.1547
		Symmetric	0	0	2.90593	4.37163	4.8074	2.66667	4.37163	1.1547	0.666667	2
F3053 + CMK-C1	Replica	Spc72 localization	Time (min)
			0	30	45	60	75	90	105	120	135	150
	#1	Not localized	0	0	2	28	32	28	4	0	0	0
		1 SPB	100	98	36	0	0	0	0	0	0	0
		dSPB	0	0	10	32	46	54	58	62	44	70
		mSPB	0	0	2	12	14	4	18	22	24	14
		Symmetric	0	2	50	28	8	14	20	16	32	16
	#2	Not localized	0	0	6	18	26	6	4	12	2	0
		1 SPB	100	100	22	0	0	0	0	0	0	0
		dSPB	0	0	10	34	46	58	62	54	54	58
		mSPB	0	0	4	6	14	10	22	18	16	14
		Symmetric	0	0	58	42	14	26	12	16	28	28
	#3	Not localized	0	0	6	20	34	22	2	2	0	0
		1 SPB	100	100	36	0	0	0	0	0	0	0
		dSPB	0	0	12	36	44	58	82	58	50	58
		mSPB	0	0	2	10	2	4	10	16	16	14
		Symmetric	0	0	44	34	20	16	6	24	34	28
	Statistics	Spc72 localization	Time (min)
			0	30	45	60	75	90	105	120	135	150
	Average	Not localized	0	0	4.66667	22	30.6667	18.6667	3.33333	4.66667	0.666667	0
		1 SPB	100	99.3333	31.3333	0	0	0	0	0	0	0
		dSPB	0	0	10.6667	34	45.3333	56.6667	67.3333	58	49.3333	62
		mSPB	0	0	2.66667	9.33333	10	6	16.6667	18.6667	18.6667	14
		Symmetric	0	0.666667	50.6667	34.6667	14	18.6667	12.6667	18.6667	31.3333	24
	Std. Dev.	Not localized	0	0	2.3094	5.2915	4.16333	11.3725	1.1547	6.4291	1.1547	0
		1 SPB	0	1.1547	8.0829	0	0	0	0	0	0	0
		dSPB	0	0	1.1547	2	1.1547	2.3094	12.8582	4	5.03322	6.9282
		mSPB	0	0	1.1547	3.05505	6.9282	3.4641	6.1101	3.05505	4.6188	0
		Symmetric	0	1.1547	7.02377	7.02377	6	6.4291	7.02377	4.6188	3.05505	6.9282
	SEM	Not localized	0	0	1.33333	3.05505	2.4037	6.56591	0.666667	3.71184	0.666667	0
		1 SPB	0	0.666667	4.66667	0	0	0	0	0	0	0
		dSPB	0	0	0.666667	1.1547	0.666667	1.33333	7.42369	2.3094	2.90593	4
		mSPB	0	0	0.666667	1.76383	4	2	3.52767	1.76383	2.66667	0
		Symmetric	0	0.666667	4.05518	4.05518	3.4641	3.71184	4.05518	2.66667	1.76383	4

## Sheet: Fig. 4
FIGURE 4D:															FIGURE 4F:
Strain	Replica	Cell cycle stage	Time (min)												Strain	Replica	Cell cycle stage	Time (min)
			0	30	45	60	75	90	105	120	135	150						0	30	45	60	75	90	105	120	135	150
F3420 + DMSO	#1	Others	99	98	64	13	1	29	91	98	98	99			F3420 + CMK-C1	#1	Others	96	98	80	10	5	4	1	15	26	50
		Metaphase	0	1	36	84	19	2	1	1	0	1					Metaphase	1	0	19	89	40	3	5	2	3	0
		Anaphase	1	1	0	3	80	69	8	1	2	0					Anaphase	3	2	1	1	55	93	94	83	71	50
	#2	Others	99	100	62	10	7	23	91	98	96	99				#2	Others	98	98	69	23	2	6	2	9	30	39
		Metaphase	0	0	38	84	7	0	1	1	2	1					Metaphase	0	0	31	75	35	4	5	1	3	0
		Anaphase	1	0	0	6	86	77	8	1	2	0					Anaphase	2	2	0	2	63	90	93	90	67	61
	#3	Others	99	98	60	10	3	29	91	97	96	99				#3	Others	99	99	69	23	0	7	7	10	36	43
		Metaphase	0	2	40	88	14	1	2	1	1	0					Metaphase	0	0	31	76	35	5	3	2	1	0
		Anaphase	1	0	0	2	83	70	7	2	3	1					Anaphase	1	1	0	1	65	88	90	88	63	57
	Statistics	Cell cycle stage	Time (min)													Statistics	Cell cycle stage	Time (min)
			0	30	45	60	75	90	105	120	135	150						0	30	45	60	75	90	105	120	135	150
	Average	Others	99	98.6667	62	11	3.66667	27	91	97.6667	96.6667	99				Average	Others	97.6667	98.3333	72.6667	18.6667	2.33333	5.66667	3.33333	11.3333	30.6667	44
		Metaphase	0	1	38	85.3333	13.3333	1	1.33333	1	1	0.666667					Metaphase	0.333333	0	27	80	36.6667	4	4.33333	1.66667	2.33333	0
		Anaphase	1	0.333333	0	3.66667	83	72	7.66667	1.33333	2.33333	0.333333					Anaphase	2	1.66667	0.333333	1.33333	61	90.3333	92.3333	87	67	56
	Std. Dev.	Others	0	1.1547	2	1.73205	3.05505	3.4641	0	0.57735	1.1547	0				Std. Dev.	Others	1.52753	0.57735	6.35085	7.50555	2.51661	1.52753	3.21455	3.21455	5.03322	5.56776
		Metaphase	0	1	2	2.3094	6.02771	1	0.57735	0	1	0.57735					Metaphase	0.57735	0	6.9282	7.81025	2.88675	1	1.1547	0.57735	1.1547	0
		Anaphase	0	0.57735	0	2.08167	3	4.3589	0.57735	0.57735	0.57735	0.57735					Anaphase	1	0.57735	0.57735	0.57735	5.2915	2.51661	2.08167	3.60555	4	5.56776
FIGURE 4E:															FIGURE 4G:
Strain	BIFC interaction		Time (min)												Strain	BIFC interaction		Time (min)
			0	30	45	60	75	90	105	120	135	150						0	30	45	60	75	90	105	120	135	150
F3420 + DMSO	Not localized		97	98	98	94	25	9	73	92	100	100			F3420 + CMK-C1	Not localized		94	99	92	98	50	10	6	1	2	2
	1 SPB		3	2	2	0	2	0	2	4	0	0				1 SPB		4	1	5	0	0	0	0	0	0	0
	dSPB		0	0	0	6	45	56	15	2	0	0				dSPB		1	0	1	1	26	37	39	40	34	35
	mSPB		0	0	0	0	14	11	3	0	0	0				mSPB		0	0	1	0	11	22	24	27	27	16
	Symmetric		0	0	0	0	14	24	7	2	0	0				Symmetric		1	0	1	1	13	31	31	32	37	47

## Sheet: Fig. 5
FIGURE 5A:																	FIGURE 5C:
Strain	Replica	Cell cycle stage	Time (min)														Strain	Replica	Cell cycle stage	Time (min)
			0	30	45	60	75	90	105	120	135	150	165	180						0	30	45	60	75	90	105	120	135	150	165	180
F3053 + DMSO	#1	Others	98	97	67	6	0	0	0	0	2	67	91	85			F3053 + DMSO	#1	Others	98	98	57	7	0	0	0	0	4	73	96	96
		Metaphase	2	3	33	94	100	100	97	63	4	1	3	13					Metaphase	2	2	43	93	100	100	98	85	20	3	0	2
		Anaphase	0	0	0	0	0	0	3	37	94	32	6	2					Anaphase	0	0	0	0	0	0	2	15	76	24	4	2
	#2	Others	98	89	51	11	1	0	2	0	7	81	90	90				#2	Others	99	99	38	9	0	0	1	2	9	60	90	93
		Metaphase	2	11	49	89	99	100	95	71	13	1	2	8					Metaphase	1	1	62	91	100	100	98	88	20	8	4	2
		Anaphase	0	0	0	0	0	0	3	29	80	18	8	2					Anaphase	0	0	0	0	0	0	1	10	71	32	6	5
	#3	Others	96	90	53	8	0	0	1	0	8	68	92	92				#3	Others	100	98	46	9	0	0	0	0	3	68	92	92
		Metaphase	3	10	47	92	100	99	97	76	13	4	4	7					Metaphase	0	1	54	91	100	100	99	85	23	4	4	6
		Anaphase	1	0	0	0	0	1	2	24	79	28	4	1					Anaphase	0	1	0	0	0	0	1	15	74	28	4	2
	Statistics	Cell cycle stage	Time (min)															Statistics	Cell cycle stage	Time (min)
			0	30	45	60	75	90	105	120	135	150	165	180						0	30	45	60	75	90	105	120	135	150	165	180
	Average	Others	97.3333	92	57	8.33333	0.333333	0	1	0	5.66667	72	91	89				Average	Others	99	98.3333	47	8.33333	0	0	0.333333	0.666667	5.33333	67	92.6667	93.6667
		Metaphase	2.33333	8	43	91.6667	99.6667	99.6667	96.3333	70	10	2	3	9.33333					Metaphase	1	1.33333	53	91.6667	100	100	98.3333	86	21	5	2.66667	3.33333
		Anaphase	0.333333	0	0	0	0	0.333333	2.66667	30	84.3333	26	6	1.66667					Anaphase	0	0.333333	0	0	0	0	1.33333	13.3333	73.6667	28	4.66667	3
	Std. Dev.	Others	1.1547	4.3589	8.7178	2.51661	0.57735	0	1	0	3.21455	7.81025	1	3.60555				Std. Dev.	Others	1	0.57735	9.53939	1.1547	0	0	0.57735	1.1547	3.21455	6.55744	3.05505	2.08167
		Metaphase	0.57735	4.3589	8.7178	2.51661	0.57735	0.57735	1.1547	6.55744	5.19615	1.73205	1	3.21455					Metaphase	1	0.57735	9.53939	1.1547	0	0	0.57735	1.73205	1.73205	2.64575	2.3094	2.3094
		Anaphase	0.57735	0	0	0	0	0.57735	0.57735	6.55744	8.3865	7.2111	2	0.57735					Anaphase	0	0.57735	0	0	0	0	0.57735	2.88675	2.51661	4	1.1547	1.73205
F3053 + CMK-C1	Replica	Cell cycle stage	Time (min)														F3053 + CMK-C1	Replica	Cell cycle stage	Time (min)
			0	30	45	60	75	90	105	120	135	150	165	180						0	30	45	60	75	90	105	120	135	150	165	180
	#1	Others	99	95	58	9	0	0	0	1	0	4	17	34				#1	Others	97	99	71	7	0	2	0	0	0	53	89	96
		Metaphase	1	5	42	91	100	100	96	86	17	11	4	2					Metaphase	2	1	29	93	100	98	100	57	14	4	4	1
		Anaphase	0	0	0	0	0	0	4	13	83	85	79	64					Anaphase	1	0	0	0	0	0	0	43	86	43	7	3
	#2	Others	98	97	56	7	0	0	2	0	1	4	25	24				#2	Others	97	99	64	11	0	0	0	0	0	65	94	97
		Metaphase	2	3	44	93	100	100	96	89	30	9	4	1					Metaphase	3	1	36	89	100	100	100	58	17	7	2	1
		Anaphase	0	0	0	0	0	0	2	11	69	87	71	75					Anaphase	0	0	0	0	0	0	0	42	83	28	4	2
	#3	Others	97	86	68	13	0	0	3	0	0	0	20	30				#3	Others	98	99	66	11	0	0	0	0	2	63	94	93
		Metaphase	3	14	32	87	100	100	97	86	30	5	6	5					Metaphase	2	1	34	84	100	100	100	60	11	8	1	4
		Anaphase	0	0	0	0	0	0	0	14	70	95	74	65					Anaphase	0	0	0	0	0	0	0	40	87	29	5	3
	Statistics	Cell cycle stage	Time (min)															Statistics	Cell cycle stage	Time (min)
			0	30	45	60	75	90	105	120	135	150	165	180						0	30	45	60	75	90	105	120	135	150	165	180
	Average	Others	98	92.6667	60.6667	9.66667	0	0	1.66667	0.333333	0.333333	2.66667	20.6667	29.3333				Average	Others	97.3333	99	67	9.66667	0	0.666667	0	0	0.666667	60.3333	92.3333	95.3333
		Metaphase	2	7.33333	39.3333	90.3333	100	100	96.3333	87	25.6667	8.33333	4.66667	2.66667					Metaphase	2.33333	1	33	88.6667	100	99.3333	100	58.3333	14	6.33333	2.33333	2
		Anaphase	0	0	0	0	0	0	2	12.6667	74	89	74.6667	68					Anaphase	0.333333	0	0	0	0	0	0	41.6667	85.3333	33.3333	5.33333	2.66667
	Std. Dev.	Others	1	5.85947	6.4291	3.05505	0	0	1.52753	0.57735	0.57735	2.3094	4.04145	5.03322				Std. Dev.	Others	0.57735	0	3.60555	2.3094	0	1.1547	0	0	1.1547	6.4291	2.88675	2.08167
		Metaphase	1	5.85947	6.4291	3.05505	0	0	0.57735	1.73205	7.50555	3.05505	1.1547	2.08167					Metaphase	0.57735	0	3.60555	4.50925	0	1.1547	0	1.52753	3	2.08167	1.52753	1.73205
		Anaphase	0	0	0	0	0	0	2	1.52753	7.81025	5.2915	4.04145	6.08276					Anaphase	0.57735	0	0	0	0	0	0	1.52753	2.08167	8.3865	1.52753	0.57735
FIGURE 5B:																	FIGURE 5D:
Strain	Spc72 localization		Time (min)														Strain	Spc72 localization		Time (min)
			0	30	45	60	75	90	105	120	135	150	165	180						0	30	45	60	75	90	105	120	135	150	165	180
F3053 + DMSO	Not localized		0	0	0	0	0	0	0	0	0	0	0	0			F3053 + DMSO	Not localized		0	0	9	9	1	0	0	0	0	0	0	0
	1 SPB		100	90	45	0	0	0	0	1	0	35	93	79				1 SPB		100	99	32	0	0	0	0	0	0	24	88	98
	dSPB		0	7	28	62	55	26	9	6	15	18	3	20				dSPB		0	1	18	56	63	42	23	20	10	18	4	2
	mSPB		0	1	6	12	4	4	19	15	25	14	2	1				mSPB		0	0	6	10	5	12	26	19	18	16	1	0
	Symmetric		0	2	21	26	41	70	72	78	60	33	2	0				Symmetric		0	0	35	25	31	46	51	61	72	42	7	0
F3053 + CMK-C1	Not localized		0	0	0	0	0	0	0	0	0	0	0	0			F3053 + CMK-C1	Not localized		0	0	6	16	23	12	5	0	0	0	0	0
	1 SPB		100	91	55	0	0	0	0	0	0	0	0	0				1 SPB		100	94	20	0	0	0	0	0	1	35	85	93
	dSPB		0	6	15	53	57	64	58	62	45	35	39	34				dSPB		0	6	19	32	42	58	71	44	25	16	2	3
	mSPB		0	1	4	13	6	3	11	8	13	17	15	13				mSPB		0	0	7	16	12	10	7	11	18	14	4	1
	Symmetric		0	2	26	34	37	33	31	30	42	48	46	53				Symmetric		0	0	48	36	23	20	17	45	56	35	9	3

## Sheet: Fig. 6
FIGURE 6A:				FIGURE 6B:
	Spc110-dsRed distribution:				Spc110-dsRed distribution:
	Asynchronous				Synchronous
Strain	WT	Reversed		Strain	WT	Reversed
F3705 + DMSO	91	9		F3705 + DMSO	91.6613	8.33871
F3705 + CMK-C1	58	42		F3705 + CMK-C1	-	-
F4140 + DMSO	87	13		F4140 + DMSO	93.2836	6.71637
F4140 + CMK-C1	64	36		F4140 + CMK-C1	69.0359	30.9641
FIGURE 6C:																	FIGURE 6F:
Strain	Replica	Cell cycle stage	Time (min)														Strain	Replica	Cell cycle stage	Time (min)
			0	30	45	60	75	90	105	120	135	150	165	180						0	30	45	60	75	90	105	120	135	150	165	180
F3705 + DMSO	#1	Others	99	2	0	0	0	7	20	16	20	67	77	71			F3705 + CMK-C1	#1	Others	100	0	0	0	1	3	42	9	16	30	42	46
		Metaphase	0	0	1	1	2	24	58	61	31	7	7	15					Metaphase	0	1	0	0	4	24	42	68	24	17	0	0
		Anaphase	1	0	0	0	1	0	13	23	49	26	16	14					Anaphase	0	0	0	0	0	0	16	23	60	53	58	54
		No MTs	0	98	99	99	97	69	9	0	0	0	0	0					No MTs	0	99	100	100	95	73	0	0	0	0	0	0
	#2	Others	99	1	0	1	0	6	17	11	25	64	76	86				#2	Others	99	0	0	1	1	11	25	8	13	26	42	36
		Metaphase	0	0	0	1	3	18	61	56	37	8	4	7					Metaphase	0	0	0	2	3	24	61	61	25	6	1	0
		Anaphase	1	0	0	0	1	2	22	33	38	28	20	7					Anaphase	1	0	0	0	0	0	13	31	62	68	57	64
		No MTs	0	99	100	98	96	74	0	0	0	0	0	0					No MTs	0	100	100	97	96	65	1	0	0	0	0	0
	#3	Others	100	3	0	0	0	6	12	11	14	60	83	82				#3	Others	100	0	0	0	1	5	11	16	13	23	41	42
		Metaphase	0	0	0	0	4	23	64	62	43	9	4	10					Metaphase	0	2	1	0	3	20	74	62	34	5	0	0
		Anaphase	0	0	0	0	0	1	22	27	43	31	13	8					Anaphase	0	0	0	0	0	0	15	22	53	72	59	58
		No MTs	0	97	100	100	96	70	2	0	0	0	0	0					No MTs	0	98	99	100	96	75	0	0	0	0	0	0
	Statistics	Cell cycle stage	Time (min)															Statistics	Cell cycle stage	Time (min)
			0	30	45	60	75	90	105	120	135	150	165	180						0	30	45	60	75	90	105	120	135	150	165	180
	Average	Others	99.3333	2	0	0.333333	0	6.33333	16.3333	12.6667	19.6667	63.6667	78.6667	79.6667				Average	Others	99.6667	0	0	0.333333	1	6.33333	26	11	14	26.3333	41.6667	41.3333
		Metaphase	0	0	0.333333	0.666667	3	21.6667	61	59.6667	37	8	5	10.6667					Metaphase	0	1	0.333333	0.666667	3.33333	22.6667	59	63.6667	27.6667	9.33333	0.333333	0
		Anaphase	0.666667	0	0	0	0.666667	1	19	27.6667	43.3333	28.3333	16.3333	9.66667					Anaphase	0.333333	0	0	0	0	0	14.6667	25.3333	58.3333	64.3333	58	58.6667
		No MTs	0	98	99.6667	99	96.3333	71	3.66667	0	0	0	0	0					No MTs	0	99	99.6667	99	95.6667	71	0.333333	0	0	0	0	0
	Std. Dev.	Others	0.57735	1	0	0.57735	0	0.57735	4.04145	2.88675	5.50757	3.51188	3.78594	7.76745				Std. Dev.	Others	0.57735	0	0	0.57735	0	4.16333	15.5242	4.3589	1.73205	3.51188	0.57735	5.03322
		Metaphase	0	0	0.57735	0.57735	1	3.21455	3	3.21455	6	1	1.73205	4.04145					Metaphase	0	1	0.57735	1.1547	0.57735	2.3094	16.0935	3.78594	5.50757	6.65833	0.57735	0
		Anaphase	0.57735	0	0	0	0.57735	1	5.19615	5.03322	5.50757	2.51661	3.51188	3.78594					Anaphase	0.57735	0	0	0	0	0	1.52753	4.93288	4.72582	10.0167	1	5.03322
		No MTs	0	1	0.57735	1	0.57735	2.64575	4.72582	0	0	0	0	0					No MTs	0	1	0.57735	1.73205	0.57735	5.2915	0.57735	0	0	0	0	0
FIGURE 6D:																	FIGURE 6G:
Strain	Replica	Spc110	Time (min)														Strain	Replica	Spc110	Time (min)
		distribution:	0	30	45	60	75	90	105	120	135	150	165	180					distribution:	0	30	45	60	75	90	105	120	135	150	165	180
F3705 + DMSO	#1	1 SPB	100	100	98	100	96	90	26	12	0	0	58	72			F3705 + CMK-C1	#1	1 SPB	100	100	100	96	94	42	6	0	0	0	0	0
		dSPB (WT)	0	0	2	0	2	4	46	44	60	56	22	18					dSPB (WT)	0	0	0	4	4	46	78	72	70	78	64	68
		mSPB (Reverse)	0	0	0	0	2	6	28	44	40	44	20	10					mSPB (Reverse)	0	0	0	0	2	12	16	28	30	22	36	32
	#2	1 SPB	100	100	98	100	98	90	18	2	4	2	50	66				#2	1 SPB	100	100	100	98	94	72	8	0	2	0	0	0
		dSPB (WT)	0	0	2	0	2	6	34	62	46	58	26	30					dSPB (WT)	0	0	0	0	4	20	74	68	68	70	70	54
		mSPB (Reverse)	0	0	0	0	0	4	48	36	50	40	24	4					mSPB (Reverse)	0	0	0	2	2	8	18	32	30	30	30	46
	#3	1 SPB	100	100	100	100	98	92	14	0	2	2	56	72				#3	1 SPB	100	100	100	100	94	62	8	0	0	0	0	0
		dSPB (WT)	0	0	0	0	2	8	36	52	50	60	30	28					dSPB (WT)	0	0	0	0	4	26	80	76	66	72	72	70
		mSPB (Reverse)	0	0	0	0	0	0	50	48	48	38	14	0					mSPB (Reverse)	0	0	0	0	2	12	12	24	34	28	28	30
	Statistics	Spc110	Time (min)															Statistics	Spc110	Time (min)
		distribution:	0	30	45	60	75	90	105	120	135	150	165	180					distribution:	0	30	45	60	75	90	105	120	135	150	165	180
	Average	1 SPB	100	100	98.6667	100	97.3333	90.6667	19.3333	4.66667	2	1.33333	54.6667	70				Average	1 SPB	100	100	100	98	94	58.6667	7.33333	0	0.666667	0	0	0
		dSPB (WT)	0	0	1.33333	0	2	6	38.6667	52.6667	52	58	26	25.3333					dSPB (WT)	0	0	0	1.33333	4	30.6667	77.3333	72	68	73.3333	68.6667	64
		mSPB (Reverse)	0	0	0	0	0.666667	3.33333	42	42.6667	46	40.6667	19.3333	4.66667					mSPB (Reverse)	0	0	0	0.666667	2	10.6667	15.3333	28	31.3333	26.6667	31.3333	36
	Std. Dev.	1 SPB	0	0	1.1547	0	1.1547	1.1547	6.1101	6.4291	2	1.1547	4.16333	3.4641				Std. Dev.	1 SPB	0	0	0	2	0	15.2753	1.1547	0	1.1547	0	0	0
		dSPB (WT)	0	0	1.1547	0	0	2	6.4291	9.0185	7.2111	2	4	6.4291					dSPB (WT)	0	0	0	2.3094	0	13.6137	3.05505	4	2	4.16333	4.16333	8.7178
		mSPB (Reverse)	0	0	0	0	1.1547	3.05505	12.1655	6.1101	5.2915	3.05505	5.03322	5.03322					mSPB (Reverse)	0	0	0	1.1547	0	2.3094	3.05505	4	2.3094	4.16333	4.16333	8.7178
FIGURE 6E:																	FIGURE 6H:
Strain	Replica	Spc72 localization	Time (min)														Strain	Replica	Spc72 localization	Time (min)
			0	30	45	60	75	90	105	120	135	150	165	180						0	30	45	60	75	90	105	120	135	150	165	180
F3705 + DMSO	#1	Not localized	0	0	0	0	0	0	0	0	0	0	0	0			F3705 + CMK-C1	#1	Not localized	0	0	0	0	0	0	0	0	0	0	0	0
		1 SPB	100	100	98	100	96	90	26	12	0	0	58	72					1 SPB	100	100	100	96	94	42	6	0	0	0	0	0
		dSPB	0	0	2	0	2	4	38	40	38	30	22	16					dSPB	0	0	0	4	2	40	66	58	66	66	38	48
		mSPB	0	0	0	0	2	2	26	34	32	34	12	10					mSPB	0	0	0	0	2	6	10	10	20	20	24	16
		Symmetric	0	0	0	0	0	4	10	14	30	36	8	2					Symmetric	0	0	0	0	2	12	18	32	14	14	38	36
	#2	Not localized	0	0	0	0	0	0	0	0	0	0	0	0				#2	Not localized	0	0	0	0	0	0	0	0	0	0	0	0
		1 SPB	100	100	98	100	98	90	18	2	4	2	50	66					1 SPB	100	100	100	98	94	72	8	0	2	0	0	0
		dSPB	0	0	2	0	2	4	40	48	40	34	22	28					dSPB	0	0	0	0	2	20	70	56	58	60	48	32
		mSPB	0	0	0	0	0	4	22	26	34	30	18	6					mSPB	0	0	0	2	2	4	12	20	24	18	20	30
		Symmetric	0	0	0	0	0	2	20	24	22	34	10	0					Symmetric	0	0	0	0	2	4	10	24	16	22	32	38
	#3	Not localized	0	0	0	0	0	0	0	0	0	0	0	0				#3	Not localized	0	0	0	0	0	0	0	0	0	0	0	0
		1 SPB	100	100	100	100	98	92	14	0	2	2	56	72					1 SPB	100	100	100	100	94	62	8	0	0	0	0	0
		dSPB	0	0	0	0	2	6	32	38	34	40	20	28					dSPB	0	0	0	0	4	20	68	52	60	52	48	54
		mSPB	0	0	0	0	0	0	36	34	26	24	10	0					mSPB	0	0	0	0	2	12	6	14	14	18	18	12
		Symmetric	0	0	0	0	0	2	18	28	38	34	14	0					Symmetric	0	0	0	0	0	6	18	34	26	30	34	34
	Statistics	Spc72 localization	Time (min)															Statistics	Spc72 localization	Time (min)
			0	30	45	60	75	90	105	120	135	150	165	180						0	30	45	60	75	90	105	120	135	150	165	180
	Average	Not localized	0	0	0	0	0	0	0	0	0	0	0	0				Average	Not localized	0	0	0	0	0	0	0	0	0	0	0	0
		1 SPB	100	100	98.6667	100	97.3333	90.6667	19.3333	4.66667	2	1.33333	54.6667	70					1 SPB	100	100	100	98	94	58.6667	7.33333	0	0.666667	0	0	0
		dSPB	0	0	1.33333	0	2	4.66667	36.6667	42	37.3333	34.6667	21.3333	24					dSPB	0	0	0	1.33333	2.66667	26.6667	68	55.3333	61.3333	59.3333	44.6667	44.6667
		mSPB	0	0	0	0	0.666667	2	28	31.3333	30.6667	29.3333	13.3333	5.33333					mSPB	0	0	0	0.666667	2	7.33333	9.33333	14.6667	19.3333	18.6667	20.6667	19.3333
		Symmetric	0	0	0	0	0	2.66667	16	22	30	34.6667	10.6667	0.666667					Symmetric	0	0	0	0	1.33333	7.33333	15.3333	30	18.6667	22	34.6667	36
	Std. Dev.	Not localized	0	0	0	0	0	0	0	0	0	0	0	0				Std. Dev.	Not localized	0	0	0	0	0	0	0	0	0	0	0	0
		1 SPB	0	0	1.1547	0	1.1547	1.1547	6.1101	6.4291	2	1.1547	4.16333	3.4641					1 SPB	0	0	0	2	0	15.2753	1.1547	0	1.1547	0	0	0
		dSPB	0	0	1.1547	0	0	1.1547	4.16333	5.2915	3.05505	5.03322	1.1547	6.9282					dSPB	0	0	0	2.3094	1.1547	11.547	2	3.05505	4.16333	7.02377	5.7735	11.3725
		mSPB	0	0	0	0	1.1547	2	7.2111	4.6188	4.16333	5.03322	4.16333	5.03322					mSPB	0	0	0	1.1547	0	4.16333	3.05505	5.03322	5.03322	1.1547	3.05505	9.45163
		Symmetric	0	0	0	0	0	1.1547	5.2915	7.2111	8	1.1547	3.05505	1.1547					Symmetric	0	0	0	0	1.1547	4.16333	4.6188	5.2915	6.4291	8	3.05505	2

## Sheet: Fig. 7
FIGURE 7A:
	Spc42-RFP distribution:
	#1			#2			#3			Average			Std. Dev.
Strain	WT	Inverted	Mispositioned	WT	Inverted	Mispositioned	WT	Inverted	Mispositioned	WT	Inverted	Mispositioned	WT	Inverted	Mispositioned
F3712	86	13	1	89	9	2	89	10	1	88	10.6667	1.33333	1.73205	2.08167	0.57735
F3774	48	32	20	53	30	17	61	26	13	54	29.3333	16.6667	6.55744	3.05505	3.51188
FIGURE 7B:
	Spc72-GFP localization:
	#1			#2			#3			Average			Std. Dev.
Strain	WT	Inverted	Mispositioned	WT	Inverted	Mispositioned	WT	Inverted	Mispositioned	WT	Inverted	Mispositioned	WT	Inverted	Mispositioned
F3712	89	10	1	90	8	2	88	11	1	89	9.66667	1.33333	1	1.52753	0.57735
F3774	50	30	20	54	29	17	63	24	13	55.6667	27.6667	16.6667	6.65833	3.21455	3.51188
FIGURE 7C:
	Spc42-RFP and Spc72-GFP distribution:
	#1		#2		#3		Average		Std. Dev.
Strain	Coincidental	Opposed	Coincidental	Opposed	Coincidental	Opposed	Coincidental	Opposed	Coincidental	Opposed
F3754	95	5	99	1	97	3	97	3	2	2
F3774	98	2	99	1	94	6	97	3	2.64575	2.64575
FIGURE 7D:
	Spc110-dsRed distribution:
	#1			#2			#3			Average			Std. Dev.
Strain	WT	Inverted	Mispositioned	WT	Inverted	Mispositioned	WT	Inverted	Mispositioned	WT	Inverted	Mispositioned	WT	Inverted	Mispositioned
F3754	93	7	0	91	9	0	93	7	0	92.3333	7.66667	0	1.1547	1.1547	0
F3836	42	35	23	41	35	24	44	33	23	42.3333	34.3333	23.3333	1.52753	1.1547	0.57735
FIGURE 7E:
	Kar9-sfGFP localization:
	#1			#2			#3			Average			Std. Dev.
Strain	dSPB	mSPB	Not localized	dSPB	mSPB	Not localized	dSPB	mSPB	Not localized	dSPB	mSPB	Not localized	dSPB	mSPB	Not localized
F3754	71	7	22	73	4	23	67	1	32	70.3333	4	25.6667	3.05505	3	5.50757
F3836	5	3	92	9	5	86	5	2	93	6.33333	3.33333	90.3333	2.3094	1.52753	3.78594
FIGURE 7F:
	Spc110-dsRed and Kar9-sfGFP distribution:
	#1			#2			#3			Average			Std. Dev.
Strain	Coincidental	Opposed	Not localized	Coincidental	Opposed	Not localized	Coincidental	Opposed	Not localized	Coincidental	Opposed	Not localized	Coincidental	Opposed	Not localized
F3754	68	10	22	65	12	23	63	5	32	65.3333	9	25.6667	2.51661	3.60555	5.50757
F3836	3	5	92	8	6	86	2	5	93	4.33333	5.33333	90.3333	3.21455	0.57735	3.78594
FIGURE 7H:
	% IP normalized to Spc72-GFP:
	#1		#2		#3		Average		Std. Dev.		SEM
Strain	Kar9	Tub4	Kar9	Tub4	Kar9	Tub4	Kar9	Tub4	Kar9	Tub4	Kar9	Tub4
F4825	1	1	1	1	1	1	1	1	0	0	0	0
F4829	0.0369052	0.487328	0.811443	0.619993	0.587576	0.741322	0.478641	0.616214	0.398594	0.127039	0.230128	0.0733459
FIGURE 7I:
	% IP normalized to Spc72-GFP:
	#1		#2		#3		Average		Std. Dev.		SEM
Strain	Kar9	Tub4	Kar9	Tub4	Kar9	Tub4	Kar9	Tub4	Kar9	Tub4	Kar9	Tub4
F4827 + DMSO	1	1	1	1	1	1	1	1	0	0	0	0
F4827 + CMK-C1	0.823507	0.910381	0.823507	0.910381	0.558272	0.412626	0.735095	0.744462	0.153134	0.287379	0.0884118	0.165918
FIGURE 7K:
	Spc72-mCherry and Kar9-GFP distribution:
	#1		#2		#3		Average		Std. Dev.
Strain	Coincidental	Opposed	Coincidental	Opposed	Coincidental	Opposed	Coincidental	Opposed	Coincidental	Opposed
F2351 + DMSO	77	23	84	16	80	20	80.3333	19.6667	3.51188	3.51188
F2351 + CMK-C1	75	25	85	15	82	18	80.6667	19.3333	5.1316	5.1316
F2845 + DMSO	80	20	84	16	84	16	82.6667	17.3333	2.3094	2.3094
F2845 + CMK-C1	66	34	73	27	66	34	68.3333	31.6667	4.04145	4.04145
FIGURE 7L:
	Spc72-mCherry and Kar9-GFP distribution:
	#1				#2				#3				Average				Std. Dev.
Strain	WT / WT	Rev / WT	Rev / Rev	WT / Rev	WT / WT	Rev / WT	Rev / Rev	WT / Rev	WT / WT	Rev / WT	Rev / Rev	WT / Rev	WT / WT	Rev / WT	Rev / Rev	WT / Rev	WT / WT	Rev / WT	Rev / Rev	WT / Rev
F2351 + DMSO	0	23	2	75	0	16	2	82	1	19	0	80	0.333333	19.3333	1.33333	79	0.57735	3.51188	1.1547	3.60555
F2351 + CMK-C1	3	22	1	74	3	12	1	84	1	17	1	81	2.33333	17	1	79.6667	1.1547	5	0	5.1316
F2845 + DMSO	4	16	3	77	0	16	3	81	0	16	1	83	1.33333	16	2.33333	80.3333	2.3094	0	1.1547	3.05505
F2845 + CMK-C1	22	12	35	31	23	4	56	17	29	5	49	17	24.6667	7	46.6667	21.6667	3.78594	4.3589	10.6927	8.0829
Legend:	WT / WT	Spc72 WT / Kar9 reversed
	Rev / WT	Spc72 reversed / Kar9 WT
	Rev / Rev	Spc72 reversed / Kar9 reversed
	WT / Rev	Spc72 WT / Kar9 WT

## Sheet: Fig. 1s1
FIGURE 1, FIGURE SUPPLEMENT 1B:
	Spc110-dsRed distribution:
	#1		#2		#3		Average		Std. Dev.
Strain	WT	Reversed	WT	Reversed	WT	Reversed	WT	Reversed	WT	Reversed
F2276	95	5	95	5	93	7	94.3333	5.66667	1.1547	1.1547
F2276 + CMK-C1	92	8	90	10	94	6	92	8	2	2
F2865	93	7	94	6	94	6	93.6667	6.33333	0.57735	0.57735
F2865 + CMK-C1	58	42	32	68	46	54	45.3333	54.6667	13.0128	13.0128
FIGURE 1, FIGURE SUPPLEMENT 1C:
		Spc110-dsRed distribution:
		#1		#2		#3		Average		Std. Dev.		SEM
Strain	Temp. (ºC)	WT	Reversed	WT	Reversed	WT	Reversed	WT	Reversed	WT	Reversed	WT	Reversed
F2111	23	88	12	93	7	93	7	91.3333	8.66667	2.88675	2.88675	1.66667	1.66667
F2111 + CMK-C1	23	91	9	91	9	90	10	90.6667	9.33333	0.57735	0.57735	0.333333	0.333333
F3703	23	92	8	91	9	85	15	89.3333	10.6667	3.78594	3.78594	2.18581	2.18581
F3703 + CMK-C1	23	59	41	57	43	53	47	56.3333	43.6667	3.05505	3.05505	1.76383	1.76383
F4441	23	79	21	83	17	81	19	81	19	2	2	1.1547	1.1547
F4696	23	84	16	92	8	85	15	87	13	4.3589	4.3589	2.51661	2.51661
F4702	23	91	9	93	7	89	11	91	9	2	2	1.1547	1.1547
F2111	37	74	26	82	18	78	22	78	22	4	4	2.3094	2.3094
F4441	37	58	42	62	38	59	41	59.6667	40.3333	2.08167	2.08167	1.20185	1.20185
F4696	37	73	27	81	19	76	24	76.6667	23.3333	4.04145	4.04145	2.33333	2.33333
F4702	37	67	33	74	26	63	37	68	32	5.56776	5.56776	3.21455	3.21455
FIGURE 1, FIGURE SUPPLEMENT 1D:
Strain	Replica	Cell cycle stage	Time (min)
			0	30	45	60	75	90	105	120	135	150
F3897 + DMSO	#1	Others	99	98	84	27	5	27	92	98	96	98
		Metaphase	0	1	16	73	25	5	3	1	1	0
		Anaphase	1	1	0	0	70	68	5	1	3	2
	#2	Others	100	98	90	23	9	26	88	99	97	99
		Metaphase	0	1	10	75	20	1	5	0	2	0
		Anaphase	0	1	0	2	71	73	7	1	1	1
	#3	Others	100	99	89	25	9	35	94	98	98	99
		Metaphase	0	1	11	68	26	1	1	1	0	0
		Anaphase	0	0	0	7	65	64	5	1	2	1
	Statistics	Cell cycle stage	Time (min)
			0	30	45	60	75	90	105	120	135	150
	Average	Others	99.6667	98.3333	87.6667	25	7.66667	29.3333	91.3333	98.3333	97	98.6667
		Metaphase	0	1	12.3333	72	23.6667	2.33333	3	0.666667	1	0
		Anaphase	0.333333	0.666667	0	3	68.6667	68.3333	5.66667	1	2	1.33333
	Std. Dev.	Others	0.57735	0.57735	3.21455	2	2.3094	4.93288	3.05505	0.57735	1	0.57735
		Metaphase	0	0	3.21455	3.60555	3.21455	2.3094	2	0.57735	1	0
		Anaphase	0.57735	0.57735	0	3.60555	3.21455	4.50925	1.1547	0	1	0.57735
F3897 + CMK-C1	Replica	Cell cycle stage	Time (min)
			0	30	45	60	75	90	105	120	135	150
	#1	Others	98	96	86	28	8	0	6	8	5	11
		Metaphase	0	4	13	71	59	8	1	1	0	0
		Anaphase	2	0	1	1	33	92	93	91	95	89
	#2	Others	100	98	83	32	3	2	5	2	6	21
		Metaphase	0	2	16	67	67	10	3	0	0	0
		Anaphase	0	0	1	1	30	88	92	98	94	79
	#3	Others	98	98	85	25	11	0	5	3	7	15
		Metaphase	0	0	14	75	58	17	1	0	0	0
		Anaphase	2	2	1	0	31	83	94	97	93	85
	Statistics	Cell cycle stage	Time (min)
			0	30	45	60	75	90	105	120	135	150
	Average	Others	98.6667	97.3333	84.6667	28.3333	7.33333	0.666667	5.33333	4.33333	6	15.6667
		Metaphase	0	2	14.3333	71	61.3333	11.6667	1.66667	0.333333	0	0
		Anaphase	1.33333	0.666667	1	0.666667	31.3333	87.6667	93	95.3333	94	84.3333
	Std. Dev.	Others	1.1547	1.1547	1.52753	3.51188	4.04145	1.1547	0.57735	3.21455	1	5.03322
		Metaphase	0	2	1.52753	4	4.93288	4.72582	1.1547	0.57735	0	0
		Anaphase	1.1547	1.1547	0	0.57735	1.52753	4.50925	1	3.78594	1	5.03322

## Sheet: Fig. 2s1
FIGURE 2, FIGURE SUPPLEMENT 1B:
		Kar9-sfGFP distribution:
		#1				#2				#3				Average				Std. Dev.						SEM
Strain	Temp. (ºC)	dSPB	mSPB	Both SPBs	Interpolar	dSPB	mSPB	Both SPBs	Interpolar	dSPB	mSPB	Both SPBs	Interpolar	dSPB	mSPB	Both SPBs	Interpolar	dSPB	mSPB	Both SPBs	Interpolar	dSPB	mSPB	Both SPBs	Interpolar
F3172	23	94	2	3	1	95	0	4	1	93	2	3	2	94	1.33333	3.33333	1.33333	1	1.1547	0.57735	0.57735	0.57735	0.666667	0.333333	0.333333
F3172 + CMK-C1	23	95	2	3	0	96	0	3	1	94	1	4	1	95	1	3.33333	0.666667	1	1	0.57735	0.57735	0.57735	0.57735	0.333333	0.333333
F3753	23	90	3	3	4	95	1	4	0	93	2	4	1	92.6667	2	3.66667	1.66667	2.51661	1	0.57735	2.08167	1.45297	0.57735	0.333333	1.20185
F3753 + CMK-C1	23	47	31	12	10	60	19	8	13	61	18	6	15	56	22.6667	8.66667	12.6667	7.81025	7.23418	3.05505	2.51661	4.50925	4.17665	1.76383	1.45297
F4498	23	87	5	5	3	79	9	11	1	86	4	6	4	84	6	7.33333	2.66667	4.3589	2.64575	3.21455	1.52753	2.51661	1.52753	1.85592	0.881917
F4698	23	89	5	2	4	84	4	9	3	80	6	10	4	84.3333	5	7	3.66667	4.50925	1	4.3589	0.57735	2.60342	0.57735	2.51661	0.333333
F4704	23	92	0	8	0	84	2	12	2	81	5	8	6	85.6667	2.33333	9.33333	2.66667	5.68624	2.51661	2.3094	3.05505	3.28295	1.45297	1.33333	1.76383
F3172	37	89	5	5	1	86	3	10	1	82	7	6	5	85.6667	5	7	2.33333	3.51188	2	2.64575	2.3094	2.02759	1.1547	1.52753	1.33333
F4498	37	56	26	5	13	63	12	15	10	54	17	15	14	57.6667	18.3333	11.6667	12.3333	4.72582	7.0946	5.7735	2.08167	2.72845	4.09607	3.33333	1.20185
F4698	37	80	10	8	2	77	9	12	2	84	6	6	4	80.3333	8.33333	8.66667	2.66667	3.51188	2.08167	3.05505	1.1547	2.02759	1.20185	1.76383	0.666667
F4704	37	61	21	8	10	58	21	13	8	57	17	16	10	58.6667	19.6667	12.3333	9.33333	2.08167	2.3094	4.04145	1.1547	1.20185	1.33333	2.33333	0.666667
FIGURE 2, FIGURE SUPPLEMENT 1C:
	Kar9-sfGFP distribution:
	#1				#2				#3				Average				Std. Dev.						SEM
Strain	dSPB	mSPB	Both SPBs	Interpolar	dSPB	mSPB	Both SPBs	Interpolar	dSPB	mSPB	Both SPBs	Interpolar	dSPB	mSPB	Both SPBs	Interpolar	dSPB	mSPB	Both SPBs	Interpolar	dSPB	mSPB	Both SPBs	Interpolar
F4628	91	2	5	2	96	2	2	0	88	3	5	4	91.6667	2.33333	4	2	4.04145	0.57735	1.73205	2	2.33333	0.333333	1	1.1547
F4628 + CMK-C1	95	2	3	0	93	5	2	0	92	2	4	2	93.3333	3	3	0.666667	1.52753	1.73205	1	1.1547	0.881917	1	0.57735	0.666667
F4684	90	1	8	1	93	3	4	0	84	4	8	4	89	2.66667	6.66667	1.66667	4.58258	1.52753	2.3094	2.08167	2.64575	0.881917	1.33333	1.20185
F4684 + CMK-C1	48	30	12	10	52	31	7	10	70	7	13	10	56.6667	22.6667	10.6667	10	11.7189	13.5769	3.21455	0	6.76593	7.83865	1.85592	0
F4632	92	2	6	0	93	2	3	2	88	5	4	3	91	3	4.33333	1.66667	2.64575	1.73205	1.52753	1.52753	1.52753	1	0.881917	0.881917
FIGURE 2, FIGURE SUPPLEMENT 1D:
Strain	Replica	Cell cycle stage	Time (min)
			0	30	45	60	75	90	105	120	135	150
F3964 + DMSO	#1	Others	100	100	98	36	18	26	87	96	99	100
		Metaphase	0	0	2	64	45	9	2	0	0	0
		Anaphase	0	0	0	0	37	65	11	4	1	0
	#2	Others	100	99	88	25	8	29	82	97	99	100
		Metaphase	0	1	12	75	50	2	3	0	1	0
		Anaphase	0	0	0	0	42	69	15	3	0	0
	#3	Others	100	100	90	30	11	37	87	97	98	99
		Metaphase	0	0	10	70	43	5	1	1	0	1
		Anaphase	0	0	0	0	46	58	12	2	2	0
	Statistics	Cell cycle stage	Time (min)
			0	30	45	60	75	90	105	120	135	150
	Average	Others	100	99.6667	92	30.3333	12.3333	30.6667	85.3333	96.6667	98.6667	99.6667
		Metaphase	0	0.333333	8	69.6667	46	5.33333	2	0.333333	0.333333	0.333333
		Anaphase	0	0	0	0	41.6667	64	12.6667	3	1	0
	Std. Dev.	Others	0	0.57735	5.2915	5.50757	5.1316	5.68624	2.88675	0.57735	0.57735	0.57735
		Metaphase	0	0.57735	5.2915	5.50757	3.60555	3.51188	1	0.57735	0.57735	0.57735
		Anaphase	0	0	0	0	4.50925	5.56776	2.08167	1	1	0
F3964 + CMK-C1	Replica	Cell cycle stage	Time (min)
			0	30	45	60	75	90	105	120	135	150
	#1	Others	100	98	87	26	8	1	5	4	16	21
		Metaphase	0	1	13	74	66	14	6	0	1	0
		Anaphase	0	1	0	0	26	85	89	96	83	79
	#2	Others	100	99	86	18	5	3	7	5	20	23
		Metaphase	0	0	13	80	60	13	0	0	0	0
		Anaphase	0	1	1	2	35	84	93	95	80	77
	#3	Others	98	99	85	24	3	2	5	2	19	25
		Metaphase	0	1	15	75	66	13	2	2	0	0
		Anaphase	2	0	0	1	31	85	93	96	81	75
	Statistics	Cell cycle stage	Time (min)
			0	30	45	60	75	90	105	120	135	150
	Average	Others	99.3333	98.6667	86	22.6667	5.33333	2	5.66667	3.66667	18.3333	23
		Metaphase	0	0.666667	13.6667	76.3333	64	13.3333	2.66667	0.666667	0.333333	0
		Anaphase	0.666667	0.666667	0.333333	1	30.6667	84.6667	91.6667	95.6667	81.3333	77
	Std. Dev.	Others	1.1547	0.57735	1	4.16333	2.51661	1	1.1547	1.52753	2.08167	2
		Metaphase	0	0.57735	1.1547	3.21455	3.4641	0.57735	3.05505	1.1547	0.57735	0
		Anaphase	1.1547	0.57735	0.57735	1	4.50925	0.57735	2.3094	0.57735	1.52753	2
FIGURE 2, FIGURE SUPPLEMENT 1F:
Strain	Replica	Cell cycle stage	Time (min)
			0	30	45	60	75	90	105	120	135	150
F3780 + DMSO	#1	Others	100	98	94	23	1	9	83	95	95	97
		Metaphase	0	2	6	75	46	4	1	2	1	2
		Anaphase	0	0	0	2	53	87	16	3	4	1
	#2	Others	100	98	92	22	1	11	87	97	98	97
		Metaphase	0	2	8	78	50	4	2	1	1	1
		Anaphase	0	0	0	0	49	85	11	2	1	2
	#3	Others	100	99	92	17	1	8	86	97	98	96
		Metaphase	0	1	8	78	52	7	2	0	0	2
		Anaphase	0	0	0	5	47	85	12	3	2	2
	Statistics	Cell cycle stage	Time (min)
			0	30	45	60	75	90	105	120	135	150
	Average	Others	100	98.3333	92.6667	20.6667	1	9.33333	85.3333	96.3333	97	96.6667
		Metaphase	0	1.66667	7.33333	77	49.3333	5	1.66667	1	0.666667	1.66667
		Anaphase	0	0	0	2.33333	49.6667	85.6667	13	2.66667	2.33333	1.66667
	Std. Dev.	Others	0	0.57735	1.1547	3.21455	0	1.52753	2.08167	1.1547	1.73205	0.57735
		Metaphase	0	0.57735	1.1547	1.73205	3.05505	1.73205	0.57735	1	0.57735	0.57735
		Anaphase	0	0	0	2.51661	3.05505	1.1547	2.64575	0.57735	1.52753	0.57735
F3780 + CMK-C1	Replica	Cell cycle stage	Time (min)
			0	30	45	60	75	90	105	120	135	150
	#1	Others	97	100	82	14	2	0	3	8	21	27
		Metaphase	0	0	17	86	49	7	2	0	0	1
		Anaphase	3	0	1	0	49	93	95	92	79	72
	#2	Others	98	99	84	15	5	2	5	8	25	34
		Metaphase	0	1	15	84	42	7	0	1	0	0
		Anaphase	2	0	1	1	53	91	95	91	75	66
	#3	Others	98	97	82	17	1	1	7	7	26	31
		Metaphase	1	1	18	83	50	5	1	0	1	0
		Anaphase	1	2	0	0	49	94	92	93	73	69
	Statistics	Cell cycle stage	Time (min)
			0	30	45	60	75	90	105	120	135	150
	Average	Others	97.6667	98.6667	82.6667	15.3333	2.66667	1	5	7.66667	24	30.6667
		Metaphase	0.333333	0.666667	16.6667	84.3333	47	6.33333	1	0.333333	0.333333	0.333333
		Anaphase	2	0.666667	0.666667	0.333333	50.3333	92.6667	94	92	75.6667	69
	Std. Dev.	Others	0.57735	1.52753	1.1547	1.52753	2.08167	1	2	0.57735	2.64575	3.51188
		Metaphase	0.57735	0.57735	1.52753	1.52753	4.3589	1.1547	1	0.57735	0.57735	0.57735
		Anaphase	1	1.1547	0.57735	0.57735	2.3094	1.52753	1.73205	1	3.05505	3
FIGURE 2, FIGURE SUPPLEMENT 1G:
Strain	Replica	Kar9 localization	Time (min)
			0	30	45	60	75	90	105	120	135	150
F3780 + DMSO	#1	dSPB	0	4	48	72	84	68	0	0	12	28
		mSPB	100	96	8	4	0	8	68	100	88	64
		Symmetric	0	0	36	12	8	8	8	0	0	8
		Preferent. dSPB	0	0	8	8	0	0	0	0	0	0
		Preferent. mSPB	0	0	0	4	0	0	0	0	0	0
		Not localized	0	0	0	0	8	16	24	0	0	0
	#2	dSPB	0	0	40	72	92	60	12	0	0	12
		mSPB	100	96	12	4	0	0	84	100	100	84
		Symmetric	0	0	20	4	0	4	0	0	0	4
		Preferent. dSPB	0	0	28	16	4	0	0	0	0	0
		Preferent. mSPB	0	0	0	4	0	0	0	0	0	0
		Not localized	0	4	0	0	4	36	4	0	0	0
	#3	dSPB	0	4	52	88	96	80	8	0	0	16
		mSPB	96	96	24	0	0	4	84	100	100	84
		Symmetric	0	0	12	0	0	0	0	0	0	0
		Preferent. dSPB	0	0	8	12	0	0	0	0	0	0
		Preferent. mSPB	0	0	4	0	0	0	0	0	0	0
		Not localized	4	0	0	0	4	16	8	0	0	0
	#4	dSPB	0	0	60	88	96	64	4	0	12	20
		mSPB	92	100	12	0	0	0	96	100	88	80
		Symmetric	0	0	28	4	0	12	0	0	0	0
		Preferent. dSPB	0	0	0	8	4	0	0	0	0	0
		Preferent. mSPB	0	0	0	0	0	0	0	0	0	0
		Not localized	8	0	0	0	0	24	0	0	0	0
	Statistics	Kar9 localization	Time (min)
			0	30	45	60	75	90	105	120	135	150
	Average	dSPB	0	2	50	80	92	68	6	0	6	19
		mSPB	97	97	14	2	0	3	83	100	94	78
		Symmetric	0	0	24	5	2	6	2	0	0	3
		Preferent. dSPB	0	0	11	11	2	0	0	0	0	0
		Preferent. mSPB	0	0	1	2	0	0	0	0	0	0
		Not localized	3	1	0	0	4	23	9	0	0	0
	Std. Dev.	dSPB	0	2.3094	8.32666	9.2376	5.65685	8.64099	5.16398	0	6.9282	6.8313
		mSPB	3.82971	2	6.9282	2.3094	0	3.82971	11.4891	0	6.9282	9.5219
		Symmetric	0	0	10.328	5.03322	4	5.16398	4	0	0	3.82971
		Preferent. dSPB	0	0	11.9443	3.82971	2.3094	0	0	0	0	0
		Preferent. mSPB	0	0	2	2.3094	0	0	0	0	0	0
		Not localized	3.82971	2	0	0	3.26599	9.45163	10.5198	0	0	0
F3780 + CMK-C1	Replica	Kar9 localization	Time (min)
			0	30	45	60	75	90	105	120	135	150
	#1	dSPB	0	0	76	76	100	88	92	60	60	60
		mSPB	100	100	16	4	0	0	0	0	8	16
		Symmetric	0	0	8	20	0	8	0	24	16	16
		Preferent. dSPB	0	0	0	0	0	4	4	4	4	0
		Preferent. mSPB	0	0	0	0	0	0	0	4	0	0
		Not localized	0	0	0	0	0	0	4	8	12	8
	#2	dSPB	0	0	72	84	92	100	80	80	56	68
		mSPB	100	100	12	0	0	0	0	0	16	8
		Symmetric	0	0	16	16	0	0	12	12	24	20
		Preferent. dSPB	0	0	0	0	8	0	4	4	4	4
		Preferent. mSPB	0	0	0	0	0	0	0	0	0	0
		Not localized	0	0	0	0	0	0	4	4	0	0
	#3	dSPB	0	0	88	76	96	92	76	72	56	64
		mSPB	100	100	0	8	0	0	4	12	20	12
		Symmetric	0	0	12	16	4	4	8	0	24	20
		Preferent. dSPB	0	0	0	0	0	4	4	12	0	0
		Preferent. mSPB	0	0	0	0	0	0	0	0	0	0
		Not localized	0	0	0	0	0	0	8	4	0	4
	#4	dSPB	0	0	84	72	100	92	96	76	60	56
		mSPB	100	100	8	0	0	0	0	0	12	16
		Symmetric	0	0	8	28	0	4	4	12	28	16
		Preferent. dSPB	0	0	0	0	0	4	0	12	0	0
		Preferent. mSPB	0	0	0	0	0	0	0	0	0	4
		Not localized	0	0	0	0	0	0	0	0	0	8
	Statistics	Kar9 localization	Time (min)
			0	30	45	60	75	90	105	120	135	150
	Average	dSPB	0	0	80	77	97	93	86	72	58	62
		mSPB	100	100	9	3	0	0	1	3	14	13
		Symmetric	0	0	11	20	1	4	6	12	23	18
		Preferent. dSPB	0	0	0	0	2	3	3	8	2	1
		Preferent. mSPB	0	0	0	0	0	0	0	1	0	1
		Not localized	0	0	0	0	0	0	4	4	3	5
	Std. Dev.	dSPB	0	0	7.30297	5.03322	3.82971	5.03322	9.5219	8.64099	2.3094	5.16398
		mSPB	0	0	6.8313	3.82971	0	0	2	6	5.16398	3.82971
		Symmetric	0	0	3.82971	5.65685	2	3.26599	5.16398	9.79796	5.03322	2.3094
		Preferent. dSPB	0	0	0	0	4	2	2	4.6188	2.3094	2
		Preferent. mSPB	0	0	0	0	0	0	0	2	0	2
		Not localized	0	0	0	0	0	0	3.26599	3.26599	6	3.82971

## Sheet: Fig. 3s1
FIGURE 3, FIGURE SUPPLEMENT 1B:																							FIGURE 3, FIGURE SUPPLEMENT 1C:
Strain	Replica	Cell cycle stage	Time (min)																				Strain	Replica	Cell cycle stage	Time (min)
			0	30	45	60	75	90	105	120	135	150														0	30	45	60	75	90	105	120	135	150
F3053 + DMSO	#1	Others	99	98	41	4	0	1	37	85	98	88											F3053 + CMK-C1	#1	Others	100	92	41	7	3	0	2	4	12	20
		Metaphase	0	2	59	95	92	19	3	4	0	12													Metaphase	0	7	59	93	97	80	12	9	2	0
		Anaphase	1	0	0	1	8	80	60	11	2	0													Anaphase	0	1	0	0	0	20	86	87	86	80
	#2	Others	99	95	30	6	0	3	31	86	95	79												#2	Others	97	94	40	5	3	1	3	3	10	18
		Metaphase	1	5	69	92	89	24	6	0	2	18													Metaphase	0	5	60	93	96	63	17	14	1	1
		Anaphase	0	0	1	2	11	73	63	14	3	3													Anaphase	3	1	0	2	1	36	80	83	89	81
	#3	Others	100	96	30	6	0	0	34	82	94	82												#3	Others	96	97	31	3	4	0	2	2	8	17
		Metaphase	0	4	70	93	93	20	5	1	2	18													Metaphase	1	3	69	95	96	80	15	9	3	0
		Anaphase	0	0	0	1	7	80	61	17	4	0													Anaphase	3	0	0	2	0	20	83	89	89	83
	Statistics	Cell cycle stage	Time (min)																					Statistics	Cell cycle stage	Time (min)
			0	30	45	60	75	90	105	120	135	150														0	30	45	60	75	90	105	120	135	150
	Average	Others	99.3333	96.3333	33.6667	5.33333	0	1.33333	34	84.3333	95.6667	83												Average	Others	97.6667	94.3333	37.3333	5	3.33333	0.333333	2.33333	3	10	18.3333
		Metaphase	0.333333	3.66667	66	93.3333	91.3333	21	4.66667	1.66667	1.33333	16													Metaphase	0.333333	5	62.6667	93.6667	96.3333	74.3333	14.6667	10.6667	2	0.333333
		Anaphase	0.333333	0	0.333333	1.33333	8.66667	77.6667	61.3333	14	3	1													Anaphase	2	0.666667	0	1.33333	0.333333	25.3333	83	86.3333	88	81.3333
	Std. Dev.	Others	0.57735	1.52753	6.35085	1.1547	0	1.52753	3	2.08167	2.08167	4.58258												Std. Dev.	Others	2.08167	2.51661	5.50757	2	0.57735	0.57735	0.57735	1	2	1.52753
		Metaphase	0.57735	1.52753	6.08276	1.52753	2.08167	2.64575	1.52753	2.08167	1.1547	3.4641													Metaphase	0.57735	2	5.50757	1.1547	0.57735	9.81495	2.51661	2.88675	1	0.57735
		Anaphase	0.57735	0	0.57735	0.57735	2.08167	4.04145	1.52753	3	1	1.73205													Anaphase	1.73205	0.57735	0	1.1547	0.57735	9.2376	3	3.05505	1.73205	1.52753
FIGURE 3, FIGURE SUPPLEMENT 1D:																							FIGURE 3, FIGURE SUPPLEMENT 1E:
	Spc72-mCherry fluorescence intensity in the pre-existing ("old") SPB																							Spc72-mCherry fluorescence intensity in the newly-generated ("new") SPB
Cell	Time (min)																						Cell	Time (min)
	0		30		45		60		75		90		105		120		135		150					0 (*)		30 (*)		45 (*)		60		75		90		105		120 (*)		135 (*)		150 (*)
	+DMSO	+CMK-C1	+DMSO	+CMK-C1	+DMSO	+CMK-C1	+DMSO	+CMK-C1	+DMSO	+CMK-C1	+DMSO	+CMK-C1	+DMSO	+CMK-C1	+DMSO	+CMK-C1	+DMSO	+CMK-C1	+DMSO	+CMK-C1				+DMSO	+CMK-C1	+DMSO	+CMK-C1	+DMSO	+CMK-C1	+DMSO	+CMK-C1	+DMSO	+CMK-C1	+DMSO	+CMK-C1	+DMSO	+CMK-C1	+DMSO	+CMK-C1	+DMSO	+CMK-C1	+DMSO	+CMK-C1
1	4529.33	11281.3	6473.67	4752	4494.67	1837.33	4434	3148	9464.67	1561	8832.33	2863	13678.7	4016	13861	1977.33	1940.33	3843.67	11095.3	2839			1					2636.33	2599.33	3337	1916.33	5228.67	771	6276	480	15973	1156.33	3768	9396.67	13110.3	5128.33	3067.67	1599
2	8118.33	1855	6784.67	6753	4267.33	2532.33	1622	3404.33	7085	2612.67	6742.33	1861.67	13961.3	7647.33	14514.7	7322.33	4292.33	3056	10360.3	21990.3			2					3403.33	3434	3619.33	2244.33	3945.33	1307	7467	672.667	12933.3	5257.33	3857.67	1098.67	7832.67	4241.67	1797	13879.7
3	9015	6613	5020	5861.67	3673.33	5474.67	657	2701.67	5789	1212.33	7574.67	4557	11023.7	1010.33	9419	6096.33	2913.67	1670.33	9485	7825.33			3					2381.33	2053.67	2737.67	1276.33	4513	1040	5458.33	818.667	12874	4347.33	1663	1374	10741	4005.33	2862	6183.33
4	10637.3	7274.67	7498.67	4894.33	7480.67	441.333	1725.67	1397.67	9614.67	3803.67	3410.67	1112.33	10616.3	8845.33	10338.7	9558	6069.67	4803.67	7579.67	9420			4					1321.33	3063.33	48.6667	1090.33	2046.33	1028.33	3357.33	934	5224	1173	2770.67	642.333		2595.33	2354.33	1069.33
5	4269	6083.33	11111.3	7316	4042.33	1139.67	3664	652.667	9966	2955	10608.7	7767	11184	1335	16265.3	5567.67	8423.67	4844.33	9933	9304			5					4797.33	4370.33	1657.67	1599.67	3992.67	716.333	6614	4157	15304	153.667	9966.67	483		3863.67	2495.33	3013.33
6	4095.67	4488.67	8354.33	6776.33	6307.33	3567.33	3890.67	1430.67	4943.33	1819.33	8878.33	1177	9543.33	5693.67	3153	6814	13520	6853.33	4977.33	12276			6					2266	4382.33	918	2189.33	7940	461	8274.33	145.333	12966.3	1393.33	8429	1519		2800.33	6331.67	7277
7	6295.67	9501.67	9395.67	7851.67	2842.67	2906	1790.67	4943	12113	1338.33	10372	1112	14697.7	7613.33	4563.33	6336	2485.67	2635.33	11281.3	13911.3			7					1492	1484.67	4882	3139.33	11207.3	427.667	9868	6051	11798.3	446.333	1550.67	4354		6906	2686	5748.33
8	11366.3	8625	4610.33	5832.33	4497	3845.67	1436.33	6013.67	9108.67	759.667	8247.33	764.667	13374	4272.67	6026.33	2108.67	1327	4773	9671	10766.3			8					3428	2333	677	3441	10387.3	189.333	2915.67	236.667	16852.3	1813	740	11108.7		1786.67	3416.67	3111.33
9	5009.33	3067.67	5280	5314.33	3568	8919.33	7477.33	3468	6563.33	1979	10942.7	3284	9990.33	8257.67	14335.3	962.333	6763.67	8018.67	15177.7	2123.33			9					1419.67	60	1224.67	1404.67	4371	897.667	7994	760.333	9041.67	1370	3914.33	260.333		5199.33	3605	415.667
10	3659	5959.67	7029.67	7121.67	7296	2585.33	2587	2523.33	7314	1913.67	9860.33	5008	12954	8257.33	8155.33	7500	9673.67	6785	10847.3	8850.67			10					1414.67	2625	1062.33	1980.67	6247	2934.33	7550.33	676.333	13120	2730	3535	1943.33		3191.33	3885	18797
11	8094	4072.33	10626.7	3407	5669	1879	3994	2843.67	7782	857.333	11384	7806.33	14940.7	3467.33	11045.3	9032.67	5272	8504.67	9166.67	7479			11					1770.67	7539.33	2640.33	2447	12716.3	2637.67	7820.67	427.333	12928.3	4393.67	13822	2777.33		1493.33		2832.33
12	4843.33	8283.67	6269	6980.67	3642.33	3817	1351	2304	8189.33	1056.33	3036	1033.67	12666.7	13254	12492	2627.33	9009.67	11516.7	9928	8645.67			12					2842	3521.67	5422.33	1492	4653.67	1342	2123.67	770	5396	11640.7		2928		4619.33		4363
13	5657.67	9747	7552.33	6420	3814.67	3063	2396.67	67	12240.7	353.667	10613.7	4009.33	9606	1874	5193.67	8101.33	13603	13194	5844	15166.3			13					4522.33	2212	471.667	577.333	6563.33	364	4507	374.667	10023.7	1316.33		2600.67		15292		1685
14	6447.67	8329.67	5233.67	5702.67	6444	6439.33	8231.67	1752.33	9341.33	1262.67	11060	4891	17631.7	974.667	2887.67	560	10351.3	13134.7	10187	11713.3			14					3092.33	3027	3585.33	510	2959.33	604.333	11512.7	527.667	11646.7	957.333		4356.67		9055.67		3213.33
15	7704.67	6384.33	6298.67	6196	3052	1821	2844.33	2035	4409.33	1175.33	10121	322	19349.7	11139	7871.33	5597.33	4401	4791.33	5056	1761.67			15					1788	711.333	2297.67	643.333	86	296.667	11244	2095.67	15572	14900.3		4001.67		2697		7145.33
16	6743.33	3588.33	7225	2177	7955.67	2448.67	4211	420	13247	840.333	8817.33	1053	2728.67	2415	7583	5225.67	8110	4663.67	4521.67	6714.33			16					2895	3028.67	126.333	1538	6555	193	11088.7	1553.33	5057.33	742.333		2841		2725.33		8789
17	4974	4885.67	8541	5094	5523	4311.67	2926.67	2282	3155.33	3929.67	13208.7	674.333	15655.3	6359	8155.33	1765.67	8541	3893.33	6844	5371.33			17					2734.67	1438.33	574	1436	1022.33	1852.33	8778	3273.33	16732.3	1515		9433.33		604.333		11386.3
18	9056.33	9613.67	8869.33	5816.33	3555.67	2231	8968.67	1786.67	7185.67	597	8464.33	422.333	15423.7	4468	17132	5994.33	9411.67	517.333	7672.67	4617			18					3408	3176.33	2968.67	401.333	1383.67	469.333	9713.67	568	6060.67	988.333		1641		6232.67		6596.33
19	6131.33	9850.33	5793	5930.33	5639.33	5203	6565	2329	14014.7	229.667	6620	2185	13338.7	17824	12282.3	7478	6817.67	4112.67	9854	6042.67			19					1072	2382	2864	92	4554.33	112.333	4223.67	1153.33	8928.67	11319.7		1695.33		6437.33		10624.3
20	4121.33	10879.7	5295	8980.33	4596.67	587.667	1042.67	1028	11566.7	1690.67	11246.3	1462.67	9740	5899.33	15131	3652	1382.67	8845.67	8387	4962.67			20					1210	2832.33	3343	1664	8807.33	2242	5926	167.667	5939.33	2633.33		10174.3		5507		1158
21	7657.67	6822	4644	6850.67	2747.67	5298.67	7020	2962.67	6047.33	1265.33	11273.3	144	9043	2376.67	6200.67	671.667	9781	3348	9040.67	3948.67			21					1702.67	2412.33	976.667	1072.67	2220	1103.33	4887.33	2115.67	5790.67	3194.33		6405.33		2509.33		16398.3
22	7423.33	6675	7744	4265	1365.33	4633.33	2103.67	4573.33	6495.67	1610.33	13307.3	1862.33	11628.3	6622	9770.33	3963	6708	2703.67	9945	14390.3			22					2575.67	3501	487.333	3202.33	596.333	1892.33	10362	1253.33	11051.3	9753.33		3975		3567		4269
23	4321.33	5192	7290.33	9149.33	3964	4890.67	1532	1383	9740.67	1629.67	12590.3	2021	12456.3	3470.33	4449.67	5369.67	9638.67	6278.33	11894.7	9599			23					3396.67	2604	5098.33	976.667	8538.67	1126	6237	177	11156.3	2654.33		5719.33		2598		7280.33
24	2445.33	9031.33	6077.33	9496.67	5760.33	2676	2729.33	2586.33	3902	1218.67	8462	552.333	13763.3	5849.33	14555.3	8175.67	6452.33	2356.67	4492	12052			24					3284.67	2901.33	1474	2816.67	1098	806.667	7289	398.333	14555	242.667		4776		4940.33		4478
25	10103.3	7998.33	5457.33	5953	3139	4118	6406.67	2724.67	5234	3544	19711	2172	15418	5346	8845.67	6141.33	7476	5011.67	8559.33	6562			25					6262.33	573.333	2947	1650.33	420.667	1748.33	7718.67	1077	3359	2754.33		4391.67		861.333		6993.67
26	7356.33	5763.33	3238	5258.67	3074.33	1002.67	4660.67	2304	4917.33	2737.67	11353.3	133.667	12072.7	2213.67	9107.67	2934.33	3324.67	1672.67	6851.67	10915			26					4216.67	474.667	1117.67	1237.33	3553.67	3374	11473.3	2580	14093	106.667		3514		10.3333		4911.67
27	11696.7	16773.3	13414	5541	5512.33	4847.33	3112	5672	2388.67	2937.67	13619	583	2612	4442.67	14741.3	4325.67	14783	4935	5793.33	2484.33			27					2969	1573.67	7216	2645	341.333	209.333	11790.7	273.667	1390.33	5684		1018.33		899.333		12950.3
28	8029.33	18565.7	6062	8999	4133	1785.33	1998	2287	3951	122.333	12852.7	4691	14373.3	2026	5054.33	3883.33	7807.67	2343.67	1613.67	8073.33			28					3047	1387	913.667	1964.67	527	1001	5612.67	2394	14113.7	269.667		6541.33		1579		5005
29	8612.33	8968	5013.67	5016.33	5900	3654	6123	2020	7123.33	847.333	9542.33	3774	10643.3	346.333	11836.7	3259.33	12232.7	11564.3	6311.33	5416.33			29					5248.33		1436.67	1351.33	3787	23.6667	7836	390.333	14263.3	1433.67		2121.33		1280.33		8106
30	10133.3	5778.33	6774.67	6785.67	5001.67	1861	3579	1042	13331.3	2744.67	6519.33	514.667	5695	3728.33	6701.67	6010	5079	1900.67	11567.3	9041			30					965.333		2395.67	627	13141.7	2984	7967	1141.33	4155	162.333		934.667		6465.33		2779.67
31	7210	5454.67	6573	4815.67	1023.33	5504	4633.67	777	9235	4301.33	8448.33	1986	6164	908	1180.67	2034	9140.67	3071.33	10663.7	10858			31					3637		952	486.333	3437.67	724	5049	1497.33	7210.67	120		3005.33		85		3937.33
32	4404	6799.33	6748	8961	1059.67	7298.33	4614	647.667	12289.7	1355.33	15293.3	3819	11581	5708.33	9159.67	9418	9966.67	7203	5318	11245.7			32					2631.33		3689	298.667	6246.33	503.333	7306.33	529	11093	4346.33		4886.67		2716		4561.67
33	9196.33	9331.33	4810	5723.67	4101.33	1696.33	10758	1529.67	2671	1502	9895.33	2992.33	14109.7	1031	14100	6519.33	9581.67	5067	8118	7802			33					1343.67		7687.67	799.333	3606	1679	3676.33	735.667	15909	2287.67		632		2249		5795
34	1134.33	9638	4182.67	4492	4874	2438	3986.67	3185.33	1277	2478.33	9619.33	3242.67	9041	12257.7	4705	7517.33	7632	2367.33	5347	10731.7			34					1963.33		3268.67	820.667	5008.67	378.333	4858	1885	4295.33	2138		831.333		4319.67		1960
35	1635.67	4890	5254.33	4608.33	6060.67	7553.67	3623.67	2352.33	8595.33	4097.33	13580.3	1914.33	11829.3	2550.33	10635.7	4670	7946	1007.33	5070	4407.33			35					3095.67		970	2014	6346.67	216.333	6287.33	512	13961	1941.67		5064		1536.33		9828
36	7561	8662.33	8487	7004.67	5847.33	5127.67	5198	4134.67	8912.33	2618.33	17438	7087.33	9879	5641.67	15576	2786.33	6366.33	6238.67	11107.3	9424.67			36							4399	1429.67	5857.67	408	10267.7	9508.33	9673	1036		1399.33		8425.33		3205.67
37	13929.7	9389.67	3866	6706.67	6188.33	4023.33	4547	720.667	6829.33	1295	6332.67	3825.33	18914	3157.67	10653.3	3665	4715.67	2415.67	5464.33	6817.67			37							683.333	1875	1033.33	820.333	4588.67	1181.67	13336	1461		1832.33		3371.67		13613
38	6667	8319	4358.33	9134.67	4417.67	5764	7088	667	3181.33	882	11824.7	3822.33	12074.7	2807	14460.7	1590	2841.33	4067	5767	1587.33			38							253.333	981	2396	1312.67	9691.33	8617.33	13225.7	954.667		195		2944.33		4123
39	8208	4337	8967	7730	2218	1191	1160	2076.33	6292.33	611	14349	3910.67	17439	2600	9377.67	3799.33	11142.3	7519.33	10748.3	12817			39							9279.67	239.667	4547.33	212.667	13901.7	2240.67	16181.7	1000		1854.67		3379.33		4436.67
40	4338	3336	4083.33	3898.67	3153	4804	649.333	2419	6765.67	1149.33	10512	1495	9203	2450.67	12917.7	7946	6914	8363.33	7785.67	4746.67			40							1311	1226.33	4354.33	1603	7447.33	1070.33	15326	179.667		14732.7		1693.33		5216.33
41	7137	3174.33	7662	7460.33	2875	3630	4802.67	2908.33	12322	219.667	3547.67	841	9994.33	3165.67	9694.33	4581	9972.33	746.333	8115.33	15163			41							561.333	1640.67	6685.67	2629.67	3015	1047	17512.3	266		1456.67		3654.33		8004
42	7294.33	9643	7847.67	5458.67	4220.33	6293	3842	1736.67	11490.7	2300.33	7922.67	3946.33	2949.33	6258.67	10304.7	2193.67	7077.67	2728	8067.67	9439			42							120	2103	4665.67	210	6795.33	2255	15601	6263.33		1661.33		923		5487.67
43	6725.33	7063.33	7548.67	10057.3	1400.33	1507.67	8566.67	526.333	6239.67	5311.67	11044.3	1173	12469.3	2855	13603	4986.67	7988.67	4357	2481	6282			43							85	1016	4433	848	14045.3	3685.67	5407	5214.33		1306		6278.33		28383
44	9206	13275	7700.33	6728	9029	7225.67	9842.33	487.667	6106.67	1266.67	16574.7	1582.33	15532	1162.67	6334	3408.33	4965.33	2314	5720.67	6245.67			44							2381.33	1642.33	7810.67	842	8715	1281.33	19132	126.333		2345.67		1645.33		2316.33
45	8012.33	9611.67	3963.67	7059.33	4239.67	6980	11799	1536.33	9446.33	2171.67	15552	1234	18678.7	4519	11081.7	8912.67	14985.3	6313.33	5634	16146.7			45							5805.67	2269.67	2371.33	915.333	5628.33	626.667	11098	1701.67		2082		2678.33		10522.7
46	6788.33	6096.67	6726.67	6458	2002.67	7773.33	3805	1349	9919	1690	6883	4088.67	15390	1831.67	5110.67	3205.67	11184	5113	5709	11154			46							1736.67	2521	12821.7	3652.67	4296.33	1027		792.667		1834.33		3898.33		10786.7
47	9031.33	5482.33	7663	2999	4655.67	5968.33	4351.67	3348.67	6844.33	115	8686	2599.67	12305	8351.67	13931.7	2721.33	13189	8461.67	12370.7	9811.67			47							4359	3658	2793	2755.67	4639.33	1195		1914		910.667		4533.67		7834.33
48	4208.67	10395	4611.33	5365.67	7162.33	3337.33	3419.33	2488.67	2659.67	386.333	7849.67	3551.33	7131	671.333	12352.3	3834.67	6521	6963.33	1326.33	3823			48							2343	2100.67	3343.67	858.333	8585	1883		2682.67		1469		6842.33		361
49	5650.67	4530.33	6443	4675.67	3741.33	6184	2241	1776.67	12731.7	616.333	4964.33	3740.33	14983	2050.33	11287.7	5600.67	9084	6008.67	10752.3	8147.67			49							1098.67	1040.67	9435.67	600.667	3583.33	869.333		735.333		1520		689.667		1359
50	7561	3662	7498.67	4579.33	3320.67	2310	1921.33	573	7188	604.667	6559.33	2165.67	11792.7	3970.33	7878.33	4423.67	11936	4608	11124.3	1651			50							1045	213.667	2275.33	299.333	9204.33	1824.67		1260.33		3700.33		123		191.667
Statistics	Time (min)																						Statistics	Time (min)
	0		30		45		60		75		90		105		120		135		150					0		30		45		60		75		90		105		120		135		150
	+DMSO	+CMK-C1	+DMSO	+CMK-C1	+DMSO	+CMK-C1	+DMSO	+CMK-C1	+DMSO	+CMK-C1	+DMSO	+CMK-C1	+DMSO	+CMK-C1	+DMSO	+CMK-C1	+DMSO	+CMK-C1	+DMSO	+CMK-C1				+DMSO	+CMK-C1	+DMSO	+CMK-C1	+DMSO	+CMK-C1	+DMSO	+CMK-C1	+DMSO	+CMK-C1	+DMSO	+CMK-C1	+DMSO	+CMK-C1	+DMSO	+CMK-C1	+DMSO	+CMK-C1	+DMSO	+CMK-C1
Average	6888.93	7500.86	6679.44	6208.19	4410.99	3928.54	4238.6	2186.53	7744.44	1711.55	10123	2576.63	12025.4	4699.86	9920.27	4856.49	7814.85	5150.11	8012.57	8451.28			Average					2749.55	2560.79	2411	1540.07	4857.48	1112.49	7309.35	1622.31	11272.5	2658.49	4910.64	3334.91	10561.4	3621.57	3250.07	6479.64
Std. Dev.	2580.44	3274.9	1996.61	1722.69	1786.41	2116.47	2683.02	1330.64	3240.41	1199.84	3515.53	1897.68	3866.96	3570.28	3934.48	2416.09	3429.25	3053.62	2945.73	4259.67			Std. Dev.					1246.52	1471.26	2106.04	870.629	3373.68	930.357	2864.67	1907.92	4486.59	3207.68	4080	3084.22	2643.42	2748.83	1248.93	5295.91
SEM	364.93	463.141	282.364	243.625	252.637	299.315	379.436	188.181	458.264	169.683	497.171	268.372	546.87	504.914	556.419	341.687	484.97	431.848	416.589	602.408			SEM					176.284	278.042	297.84	123.126	477.11	131.572	405.125	269.821	668.822	453.635	1230.17	436.175	1526.18	388.743	394.948	748.955
																								(*) Note that n<50 as a consequence of the reduced population of cells displaying a new SPB at the indicated time point.
FIGURE 3, FIGURE SUPPLEMENT 1F:															FIGURE 3, FIGURE SUPPLEMENT 1H:
Strain	Replica	Cell cycle stage	Time (min)												Strain	Replica	Cell cycle stage	Time (min)
			0	30	45	60	75	90	105	120	135	150						0	30	45	60	75	90	105	120	135	150
F3766 + DMSO	#1	Others	92	92	96	46	10	3	4	69	82	96			F3766 + CMK-C1	#1	Others	90	89	89	39	13	17	8	4	16	27
		Metaphase	0	1	3	49	84	63	18	3	5	2					Metaphase	2	5	3	51	79	75	62	22	9	1
		Anaphase	8	7	1	5	6	34	78	28	13	2					Anaphase	8	6	8	10	8	8	30	74	75	72
	#2	Others	93	95	86	54	11	8	8	75	81	90				#2	Others	92	91	93	41	17	13	6	5	12	26
		Metaphase	0	0	13	45	78	75	21	5	3	3					Metaphase	2	6	6	54	79	81	67	31	12	6
		Anaphase	7	5	1	1	11	17	71	20	16	7					Anaphase	6	3	1	5	4	6	27	64	76	68
	#3	Others	92	94	95	42	7	2	7	71	84	94				#3	Others	91	90	93	47	7	10	8	5	12	28
		Metaphase	0	0	5	57	89	84	18	3	3	3					Metaphase	1	5	4	47	84	82	58	33	9	1
		Anaphase	8	6	0	1	4	14	75	26	13	3					Anaphase	8	5	3	6	9	8	34	62	79	71
	Statistics	Cell cycle stage	Time (min)													Statistics	Cell cycle stage
			0	30	45	60	75	90	105	120	135	150
	Average	Others	92.3333	93.6667	92.3333	47.3333	9.33333	4.33333	6.33333	71.6667	82.3333	93.3333				Average	Others	91	90	91.6667	42.3333	12.3333	13.3333	7.33333	4.66667	13.3333	27
		Metaphase	0	0.333333	7	50.3333	83.6667	74	19	3.66667	3.66667	2.66667					Metaphase	1.66667	5.33333	4.33333	50.6667	80.6667	79.3333	62.3333	28.6667	10	2.66667
		Anaphase	7.66667	6	0.666667	2.33333	7	21.6667	74.6667	24.6667	14	4					Anaphase	7.33333	4.66667	4	7	7	7.33333	30.3333	66.6667	76.6667	70.3333
	Std. Dev.	Others	0.57735	1.52753	5.50757	6.1101	2.08167	3.21455	2.08167	3.05505	1.52753	3.05505				Std. Dev.	Others	1	1	2.3094	4.16333	5.03322	3.51188	1.1547	0.57735	2.3094	1
		Metaphase	0	0.57735	5.2915	6.1101	5.50757	10.5357	1.73205	1.1547	1.1547	0.57735					Metaphase	0.57735	0.57735	1.52753	3.51188	2.88675	3.78594	4.50925	5.85947	1.73205	2.88675
		Anaphase	0.57735	1	0.57735	2.3094	3.60555	10.7858	3.51188	4.16333	1.73205	2.64575					Anaphase	1.1547	1.52753	3.60555	2.64575	2.64575	1.1547	3.51188	6.4291	2.08167	2.08167
FIGURE 3, FIGURE SUPPLEMENT 1G:															FIGURE 3, FIGURE SUPPLEMENT 1I:
Strain	Replica	Spc110	Time (min)												Strain	Replica	Spc110	Time (min)
		distribution:	0	30	45	60	75	90	105	120	135	150					distribution:	0	30	45	60	75	90	105	120	135	150
F3766 + DMSO	#1	1 SPB	100	100	96	32	6	0	0	30	80	94			F3766 + CMK-C1	#1	1 SPB	100	96	96	30	2	0	0	0	0	0
		dSPB (WT)	0	0	4	58	86	88	86	60	16	6					dSPB (WT)	0	2	2	52	80	90	96	84	72	82
		mSPB (Reverse)	0	0	0	10	8	12	14	10	4	0					mSPB (Reverse)	0	2	2	18	18	10	4	16	28	18
	#2	1 SPB	100	100	94	42	0	0	0	22	82	96				#2	1 SPB	100	98	94	28	0	0	0	0	0	0
		dSPB (WT)	0	0	6	50	96	90	84	64	10	2					dSPB (WT)	0	0	6	52	78	82	90	82	78	76
		mSPB (Reverse)	0	0	0	8	4	10	16	14	8	2					mSPB (Reverse)	0	2	0	20	22	18	10	18	22	24
	#3	1 SPB	100	100	98	24	0	0	4	48	88	92				#3	1 SPB	100	98	98	16	0	0	0	0	0	0
		dSPB (WT)	0	0	2	62	94	84	88	42	10	8					dSPB (WT)	0	2	2	68	84	74	90	80	86	70
		mSPB (Reverse)	0	0	0	14	6	16	8	10	2	0					mSPB (Reverse)	0	0	0	16	16	26	10	20	14	30
	Statistics	Spc110	Time (min)													Statistics	Spc110	Time (min)
		distribution:	0	30	45	60	75	90	105	120	135	150					distribution:	0	30	45	60	75	90	105	120	135	150
	Average	1 SPB	100	100	96	32.6667	2	0	1.33333	33.3333	83.3333	94				Average	1 SPB	100	97.3333	96	24.6667	0.666667	0	0	0	0	0
		dSPB (WT)	0	0	4	56.6667	92	87.3333	86	55.3333	12	5.33333					dSPB (WT)	0	1.33333	3.33333	57.3333	80.6667	82	92	82	78.6667	76
		mSPB (Reverse)	0	0	0	10.6667	6	12.6667	12.6667	11.3333	4.66667	0.666667					mSPB (Reverse)	0	1.33333	0.666667	18	18.6667	18	8	18	21.3333	24
	Std. Dev.	1 SPB	0	0	2	9.0185	3.4641	0	2.3094	13.3167	4.16333	2				Std. Dev.	1 SPB	0	1.1547	2	7.57188	1.1547	0	0	0	0	0
		dSPB (WT)	0	0	2	6.1101	5.2915	3.05505	2	11.7189	3.4641	3.05505					dSPB (WT)	0	1.1547	2.3094	9.2376	3.05505	8	3.4641	2	7.02377	6
		mSPB (Reverse)	0	0	0	3.05505	2	3.05505	4.16333	2.3094	3.05505	1.1547					mSPB (Reverse)	0	1.1547	1.1547	2	3.05505	8	3.4641	2	7.02377	6

[truncated: 4 more sheets: Fig. 5s1, Fig. 5s2, Fig. 5s3, Fig. 7s1]
