# Supplementary figures and images for: Polo-like kinase acts as a molecular timer that safeguards the asymmetric fate of spindle microtubule-organizing centers
Source: eLife journal article supplement (doi:10.7554/elife.61488), 2020-11-02

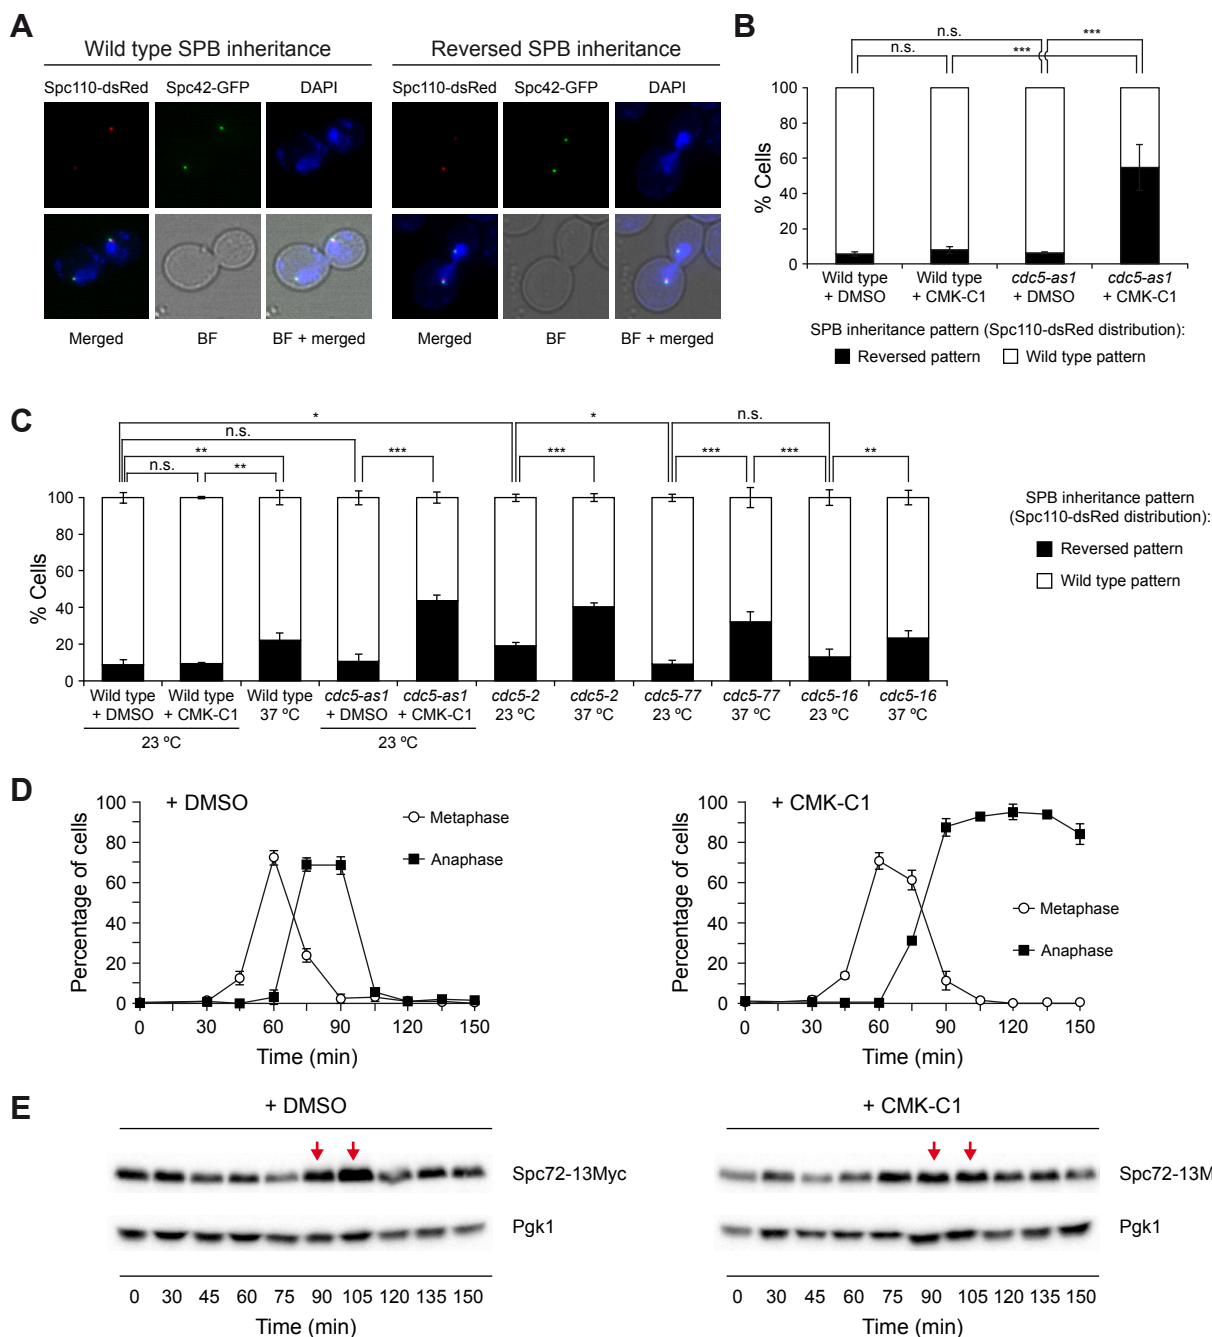

Figure 1-figure supplement 1

Supplement: supp [file elife-61488-supp-v1.zip]

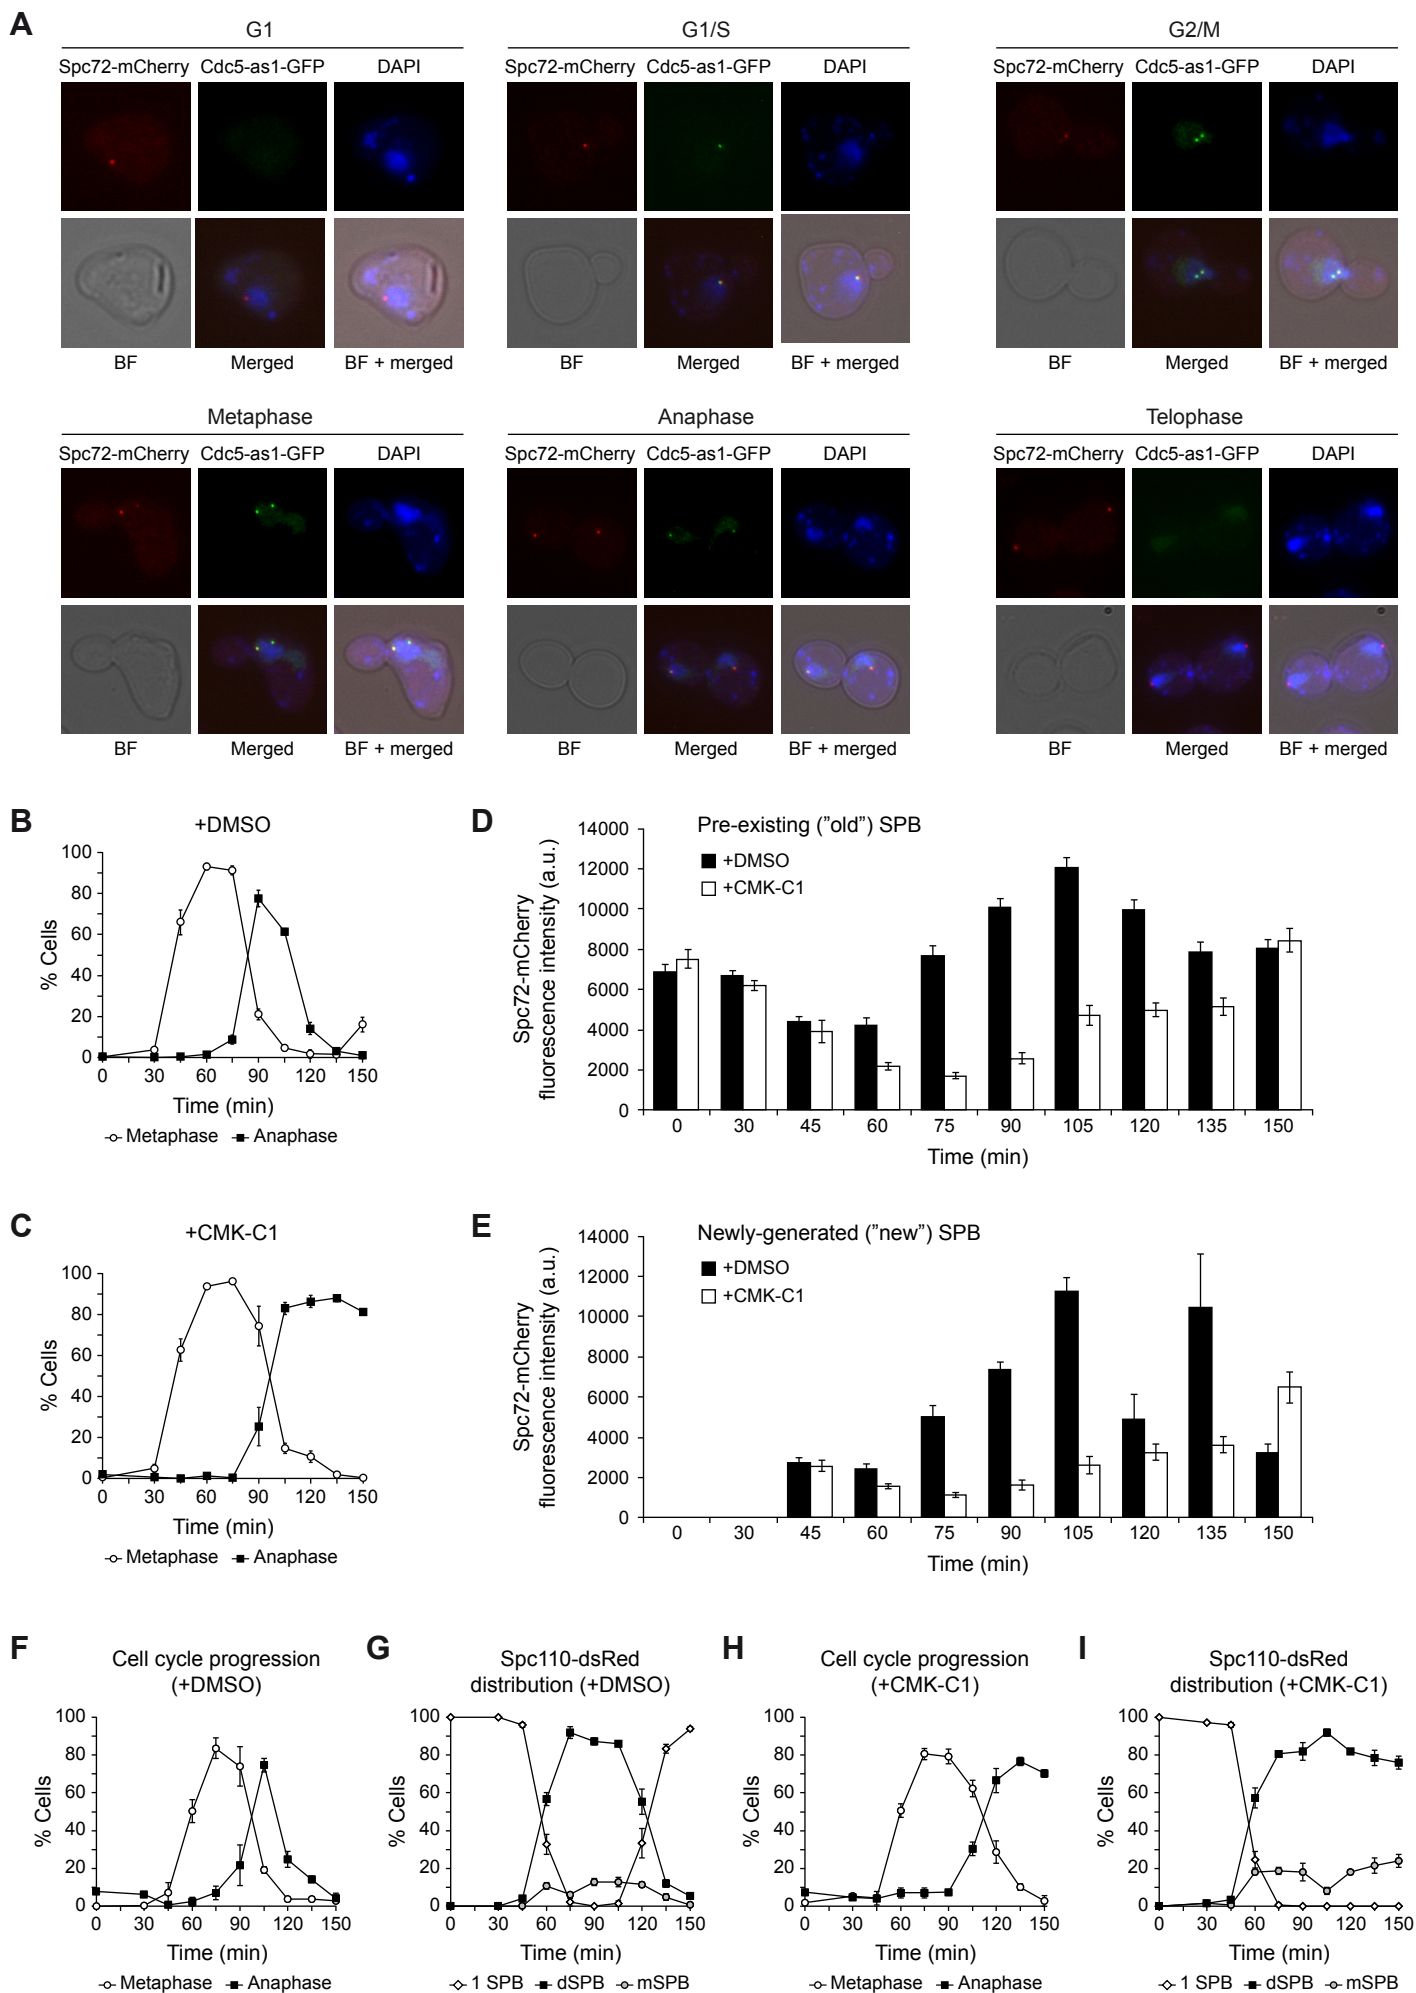

**Figure 3-figure supplement 1**

Supplement: supp [file elife-61488-supp-v1.zip]

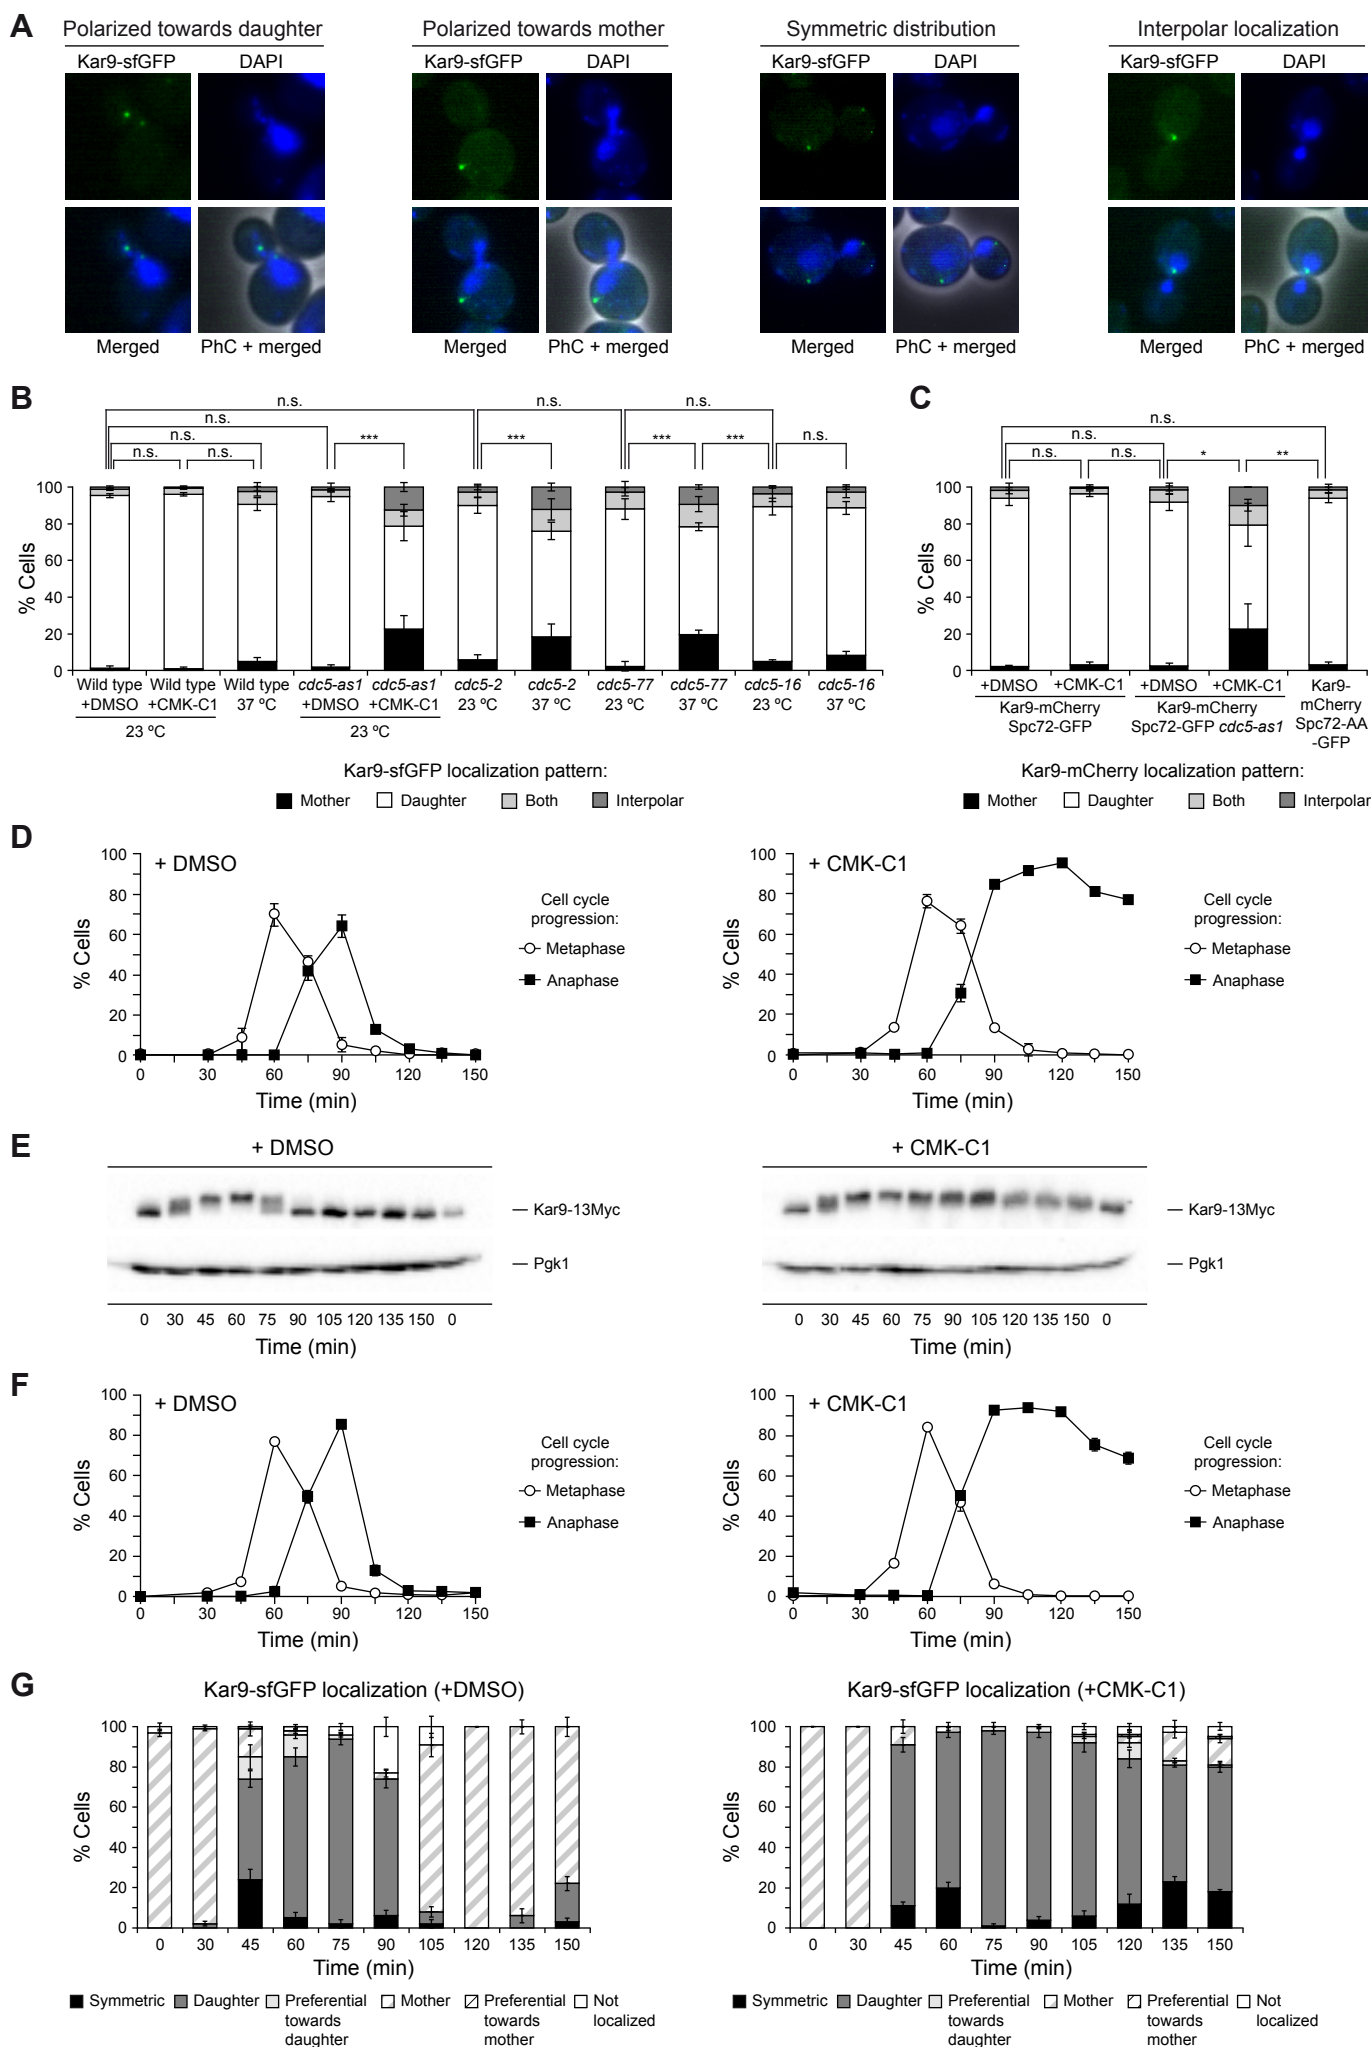

Figure 2-figure supplement 1

Supplement: supp [file elife-61488-supp-v1.zip]

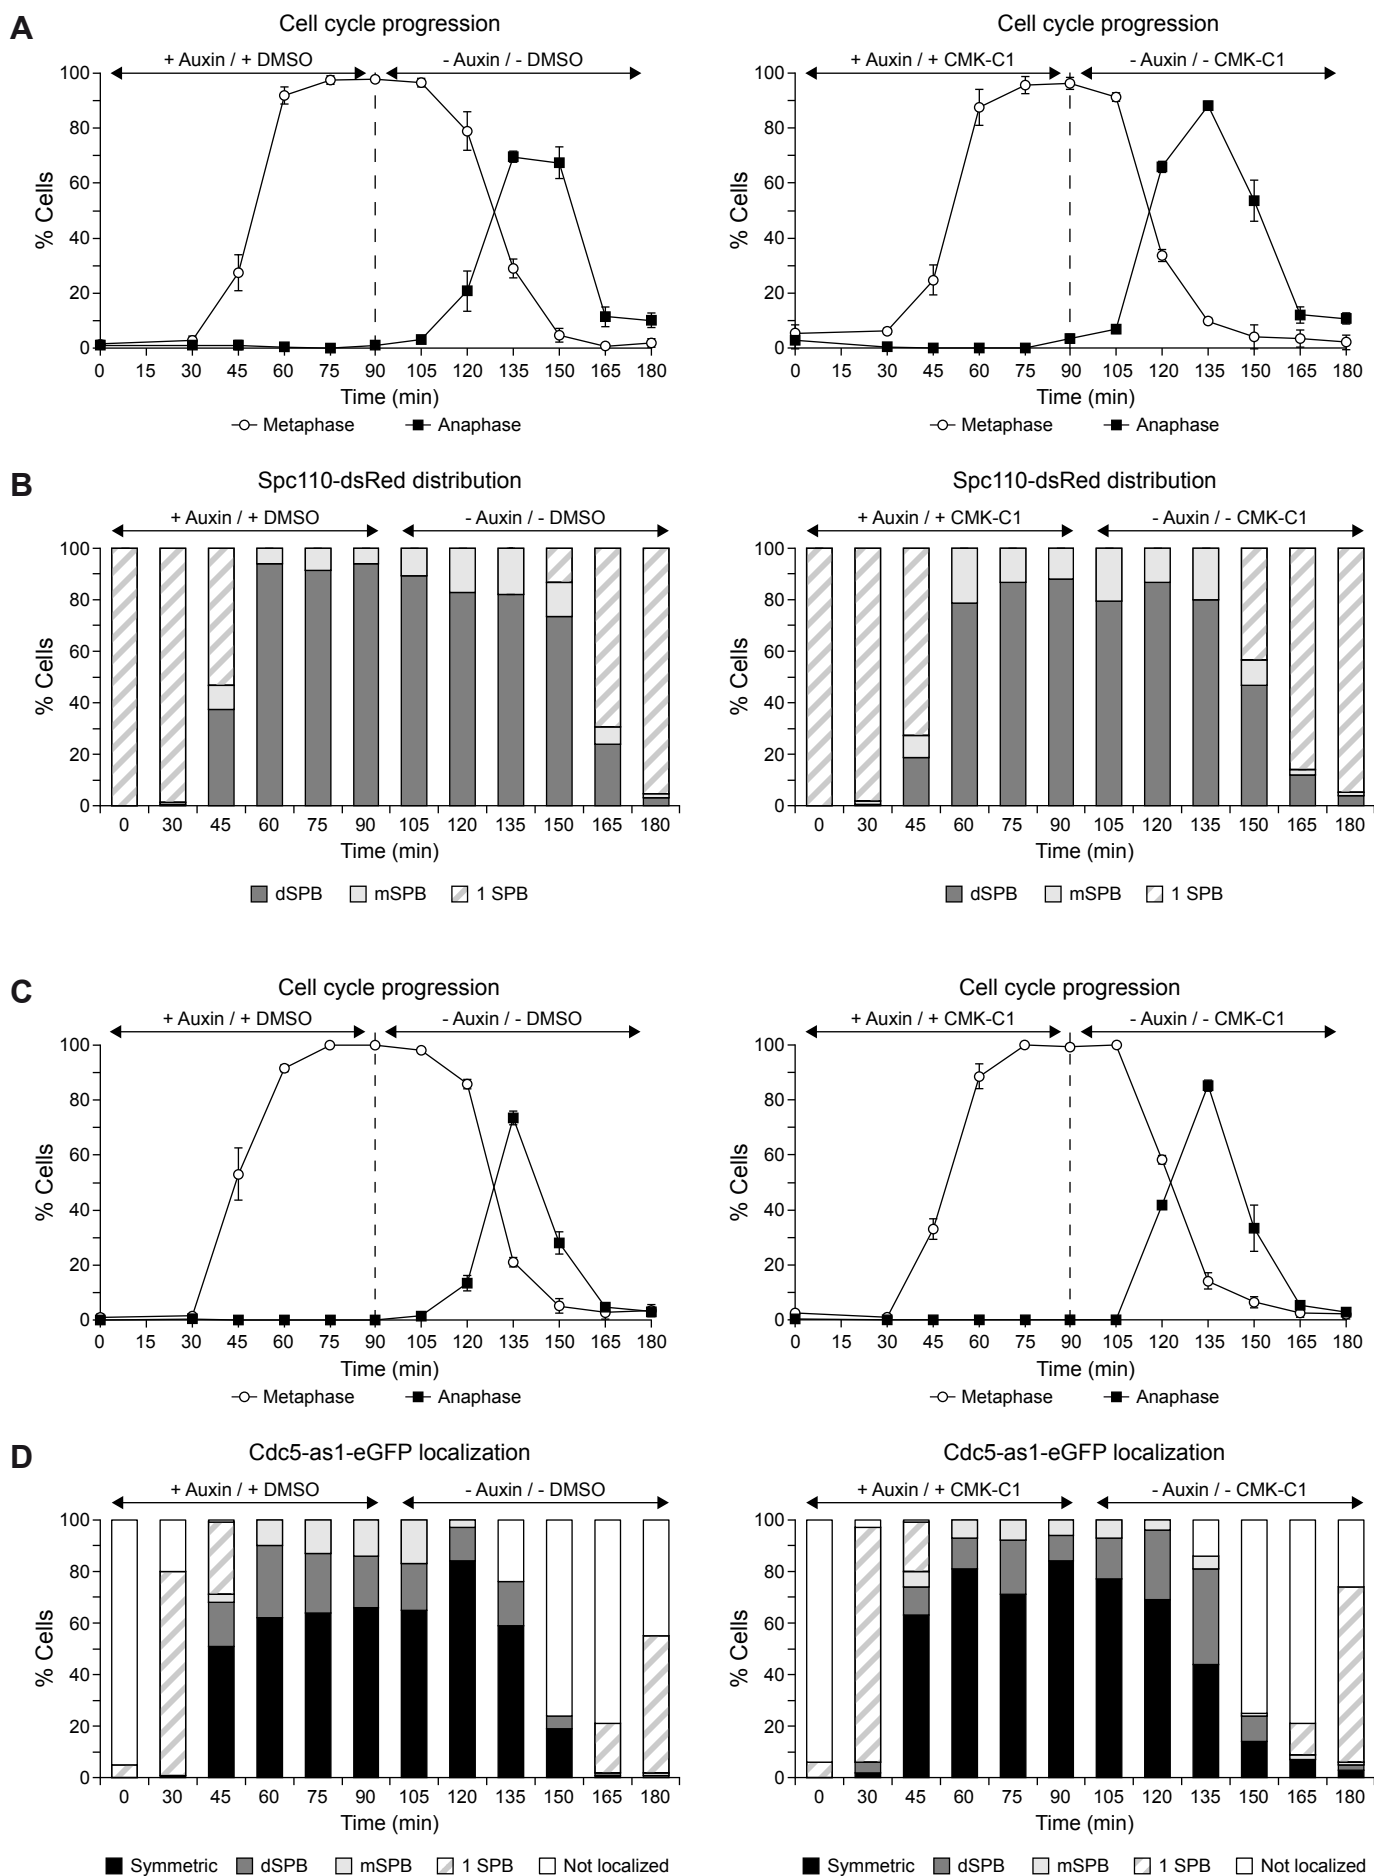

Figure 5-figure supplement 2

Supplement: supp [file elife-61488-supp-v1.zip]

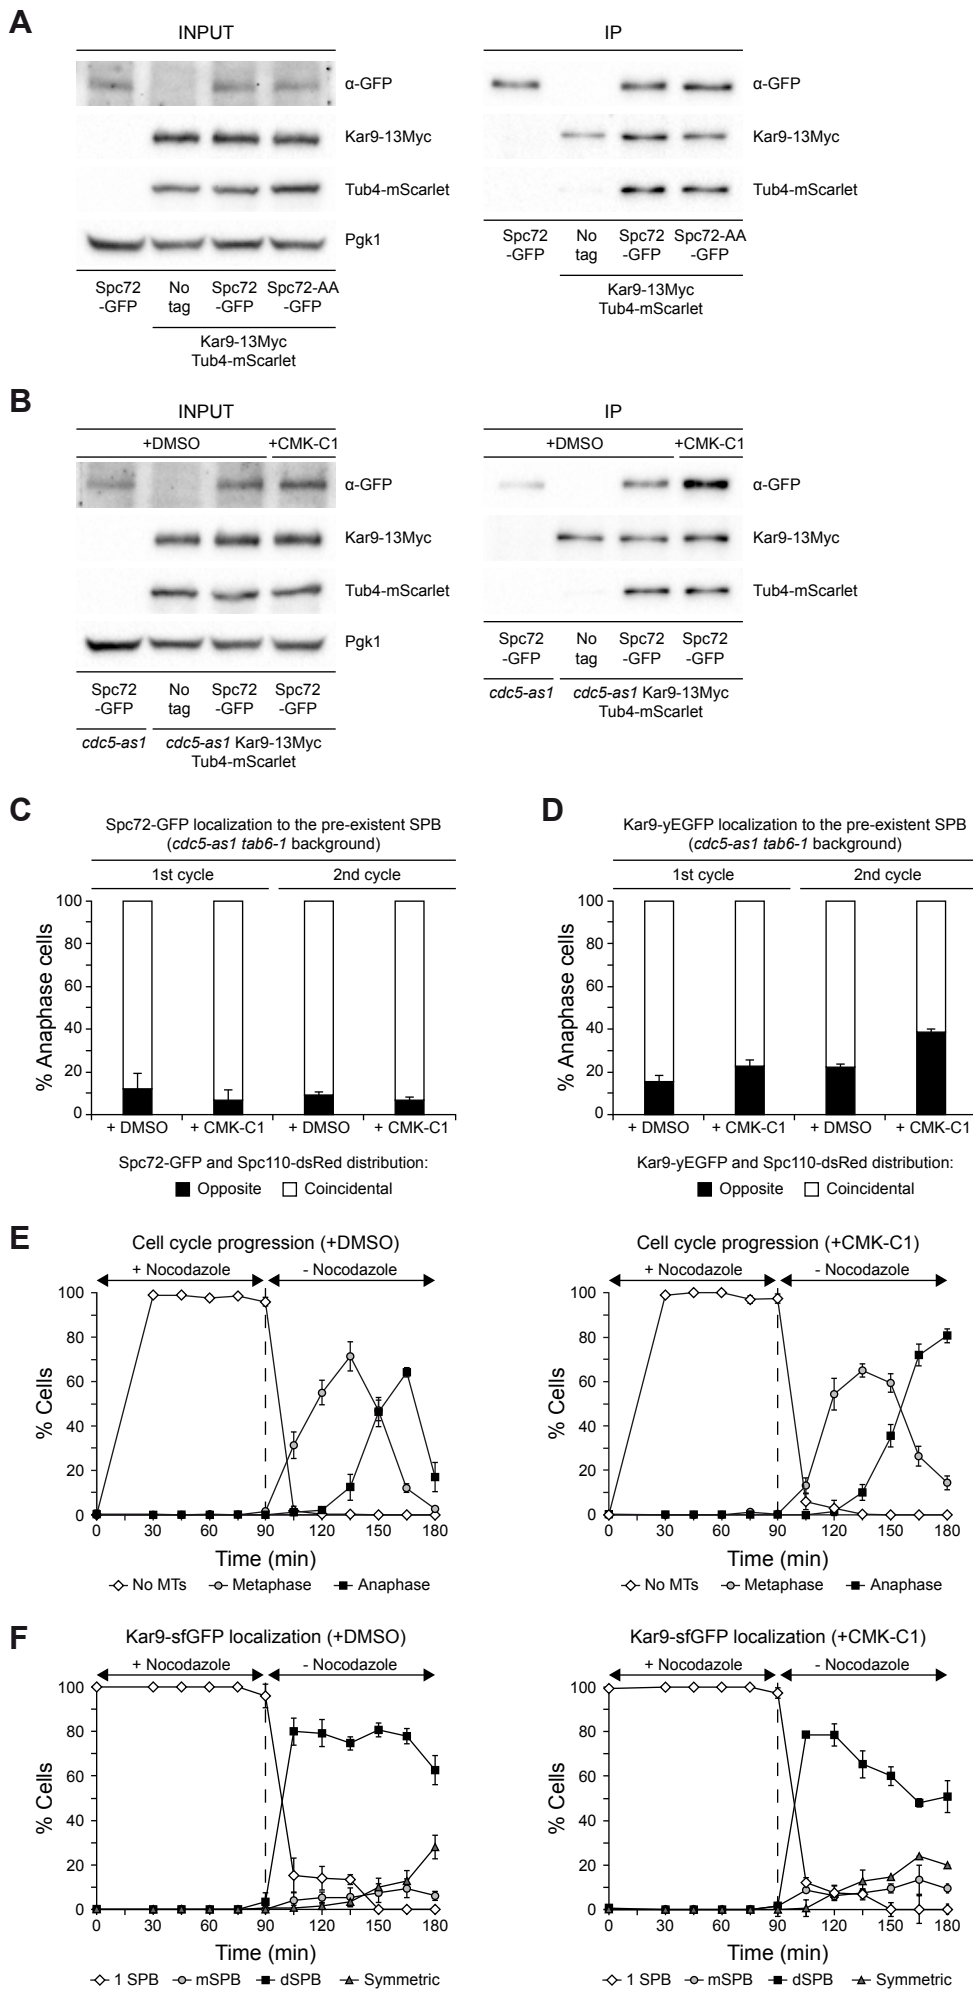

Figure 7-figure supplement 1

Supplement: supp [file elife-61488-supp-v1.zip]

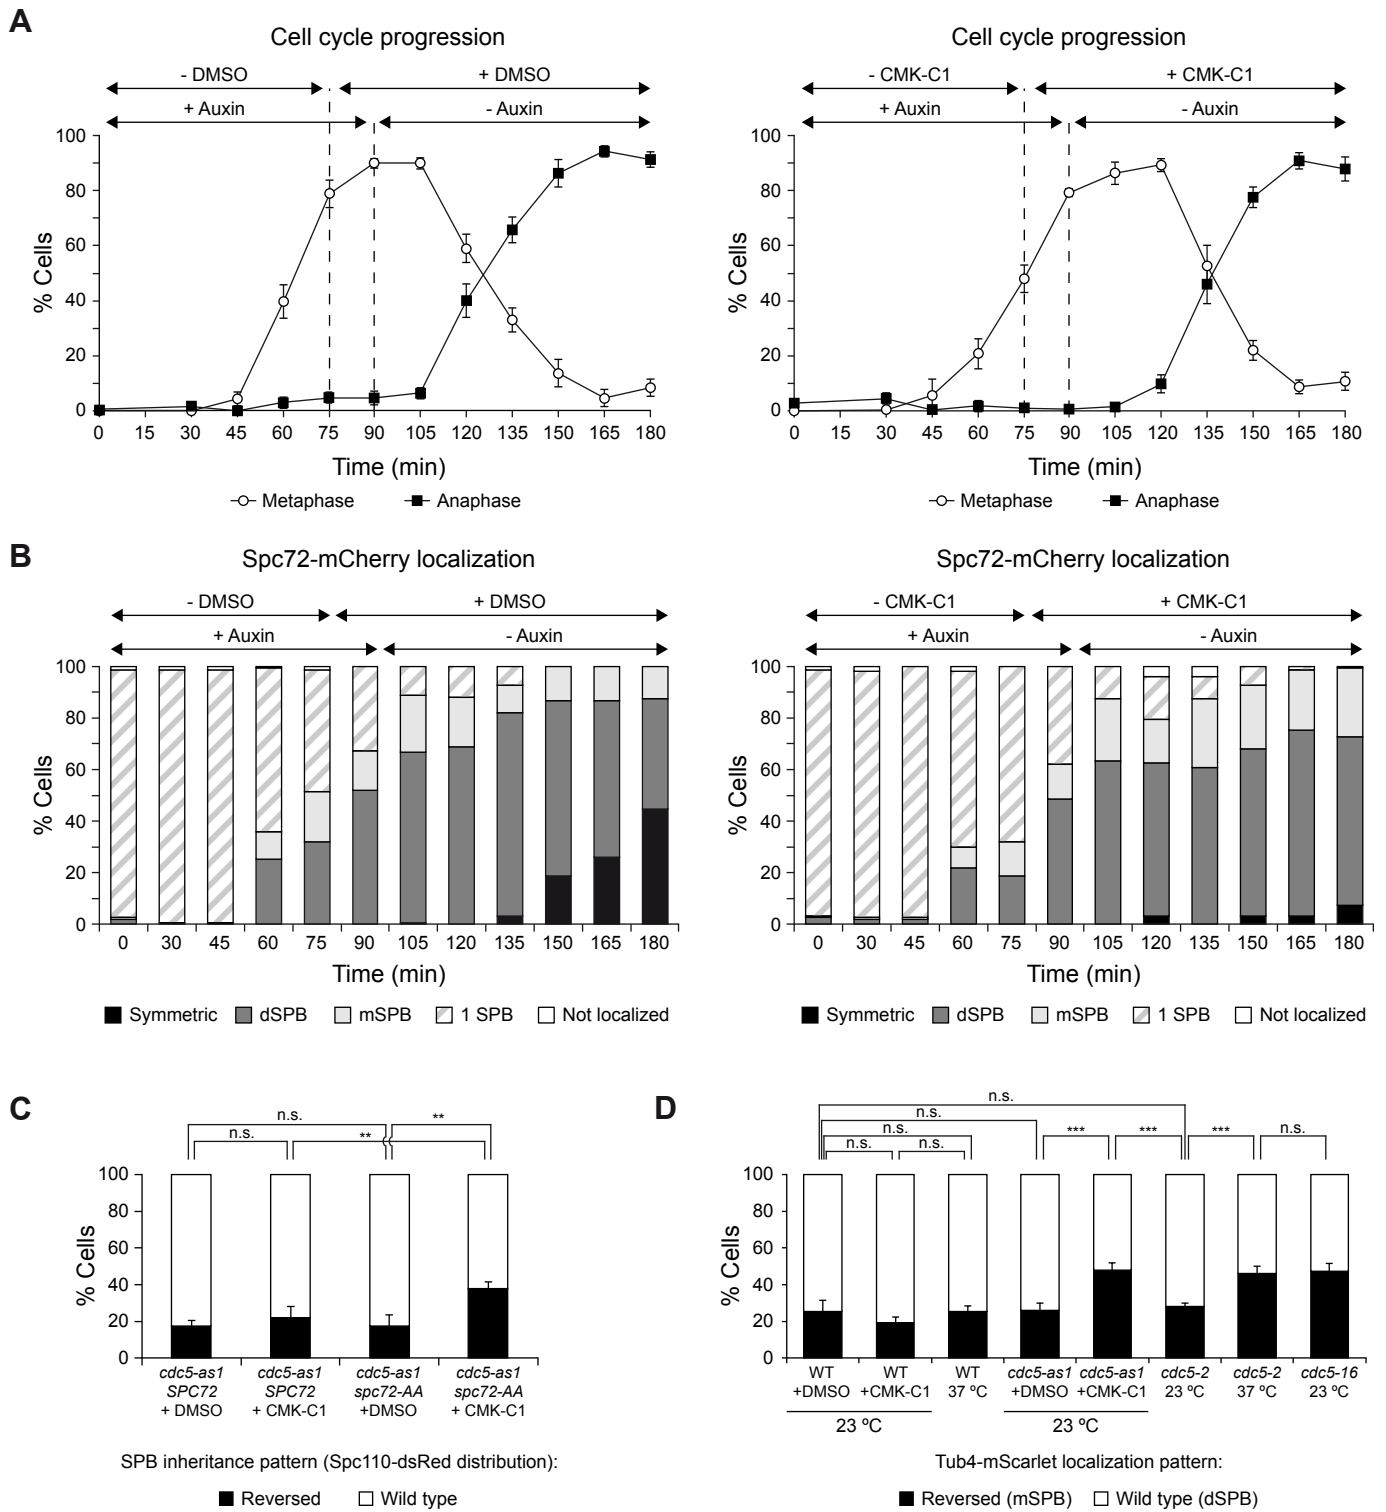

Figure 5-figure supplement 3

Supplement: supp [file elife-61488-supp-v1.zip]

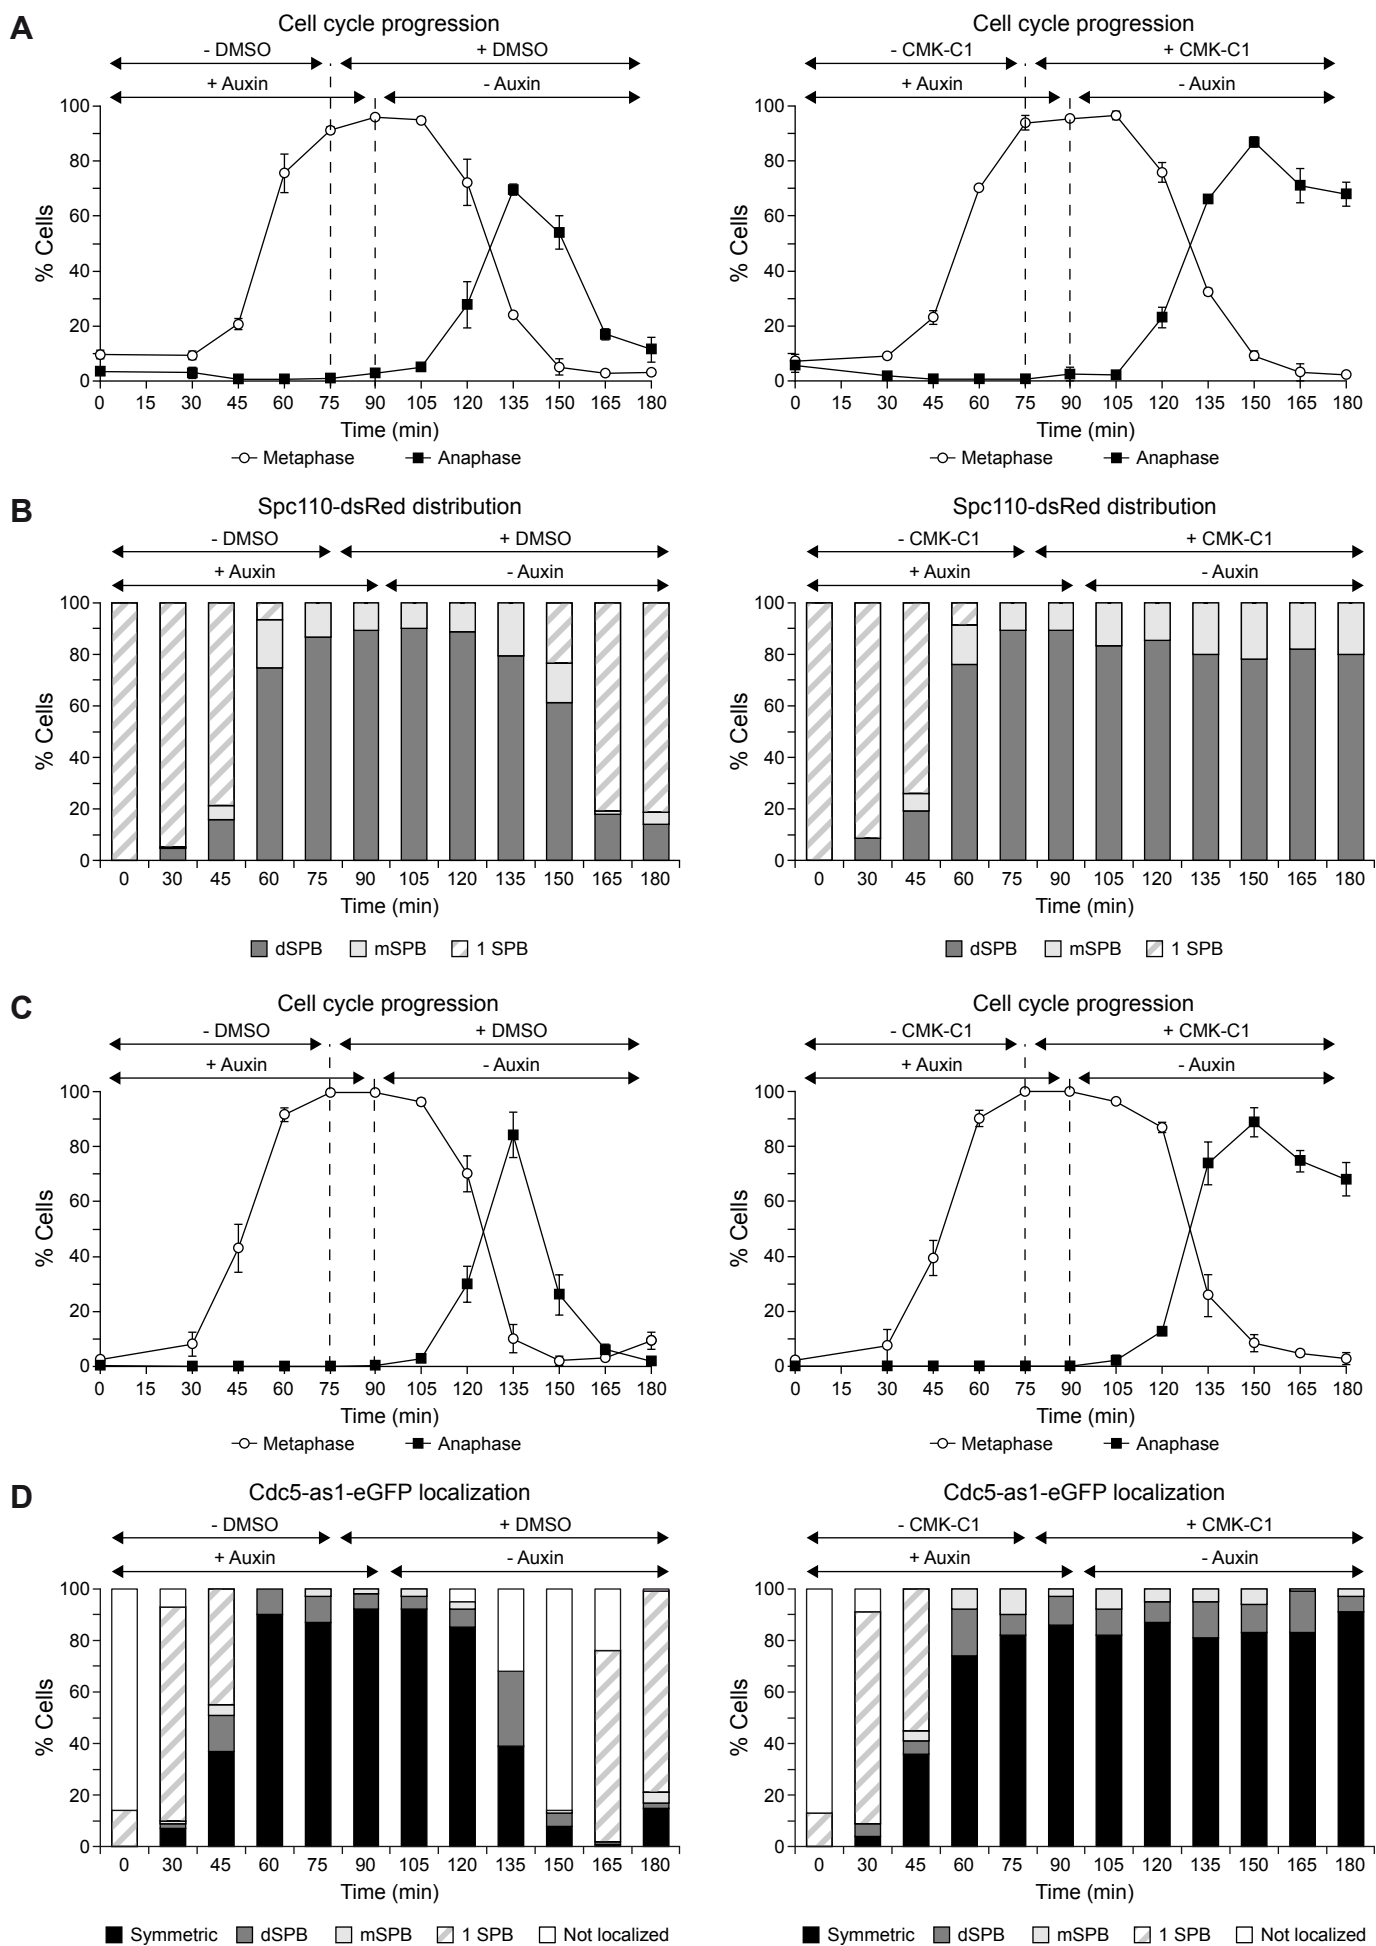

Figure 5-figure supplement 1

Supplement: supp [file elife-61488-supp-v1.zip]
